# Supplementary material for: TMT-Based Proteomic Analysis of Plasma from Children with Rolandic Epilepsy
Source: Hindawi journal article supplement (doi:10.1155/2020/8840482), 2020-10-07
Supplement: f1 [file 8840482.f1.pdf]

TABLE S1. MS/MS spectrum database search analysis summary

| Total spectrum | Matched spectrum | Peptides | Unique peptides | Identified proteins | Quantifiable proteins |
|----------------|------------------|----------|-----------------|---------------------|-----------------------|
| 213300         | 17617            | 4659     | 4541            | 752                 | 670                   |
