# Supplementary material for: TMT-Based Proteomic Analysis of Plasma from Children with Rolandic Epilepsy
Source: Hindawi journal article supplement (doi:10.1155/2020/8840482), 2020-10-07

**a**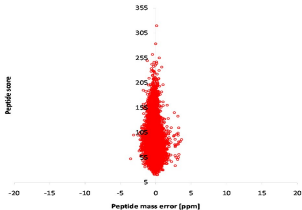**b**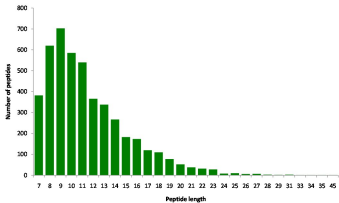

Supplement: f2 [file 8840482.f2.pdf]
