# Supplementary material for: TMT-Based Proteomic Analysis of Plasma from Children with Rolandic Epilepsy
Source: Hindawi journal article supplement (doi:10.1155/2020/8840482), 2020-10-07
Supplement: f3 [file 8840482.f3.pdf]

Table S2. The list of identified protein between epilepsy and control group by TMT-based proteomics analysis.

| Protein accession | Protein description                                                                               | Gene name | MW [kDa] | Score  | Peptides |
|-------------------|---------------------------------------------------------------------------------------------------|-----------|----------|--------|----------|
| A0A075B6S6        | Immunoglobulin kappa variable 2D-30 OS=Homo sapiens GN=IGKV2D-30                                  | IGKV2D-30 | 13.215   | 26.129 | 1        |
| A0JNW5            | UHRF1-binding protein 1-like OS=Homo sapiens GN=UHRF1BP1L                                         | UHRF1BP1L | 164.2    | -2     | 1        |
| A1L4H1            | Soluble scavenger receptor cysteine-rich domain-containing protein SSC5D OS=Homo sapiens GN=SSC5D | SSC5D     | 165.74   | 63.166 | 9        |
| A6NCI4            | von Willebrand factor A domain-containing protein 3A OS=Homo sapiens GN=VWA3A                     | VWA3A     | 134.02   | 6.4567 | 1        |
| B9A064            | Immunoglobulin lambda-like polypeptide 5 OS=Homo sapiens GN=IGLL5                                 | IGLL5     | 23.063   | 88.627 | 5        |
| I6L899            | Golgin subfamily A member 8R OS=Homo sapiens GN=GOLGA8R                                           | GOLGA8R   | 71.489   | -2     | 1        |
| O00142            | Thymidine kinase 2, mitochondrial OS=Homo sapiens GN=TK2                                          | TK2       | 31.004   | 7.0125 | 1        |
| O00187            | Mannan-binding lectin serine protease 2 OS=Homo sapiens GN=MASP2                                  | MASP2     | 75.702   | 192.91 | 12       |
| O00299            | Chloride intracellular channel protein 1 OS=Homo sapiens GN=CLIC1                                 | CLIC1     | 26.922   | 6.3136 | 1        |
| O00391            | Sulfhydryl oxidase 1 OS=Homo sapiens GN=QSOX1                                                     | QSOX1     | 82.577   | 177.41 | 13       |
| O00429            | Dynamin-1-like protein OS=Homo sapiens GN=DNM1L                                                   | DNM1L     | 81.876   | 7.7284 | 1        |
| O00462            | Beta-mannosidase OS=Homo sapiens GN=MANBA                                                         | MANBA     | 100.89   | 20.882 | 3        |
| O00533            | Neural cell adhesion molecule L1-like protein OS=Homo sapiens GN=CHL1                             | CHL1      | 135.07   | 318.4  | 17       |
| O00592            | Podocalyxin OS=Homo sapiens GN=PODXL                                                              | PODXL     | 58.635   | 19.174 | 2        |
| O00602            | Ficolin-1 OS=Homo sapiens GN=FCN1                                                                 | FCN1      | 35.078   | 26.434 | 2        |
| O14498            | Immunoglobulin superfamily containing leucine-rich repeat protein OS=Homo sapiens GN=ISLR         | ISLR      | 45.997   | 12.563 | 2        |
| O14786            | Neuropilin-1 OS=Homo sapiens GN=NRP1                                                              | NRP1      | 103.13   | 153.59 | 6        |
| O14791            | Apolipoprotein L1 OS=Homo sapiens GN=APOL1                                                        | APOL1     | 43.974   | 187.11 | 15       |
| O14810            | Complexin-1 OS=Homo sapiens GN=CPLX1                                                              | CPLX1     | 15.03    | 50.144 | 1        |
| O14983            | Sarcoplasmic/endoplasmic reticulum calcium ATPase 1 OS=Homo sapiens GN=ATP2A1                     | ATP2A1    | 110.25   | 14.293 | 1        |
| O15031            | Plexin-B2 OS=Homo sapiens GN=PLXNB2                                                               | PLXNB2    | 205.12   | 62.488 | 3        |
| O15061            | Synemin OS=Homo sapiens GN=SYNM                                                                   | SYNM      | 172.77   | 6.7284 | 1        |
| O15335            | Chondroadherin OS=Homo sapiens GN=CHAD                                                            | CHAD      | 40.475   | 45.321 | 5        |
| O15394            | Neural cell adhesion molecule 2 OS=Homo sapiens GN=NCAM2                                          | NCAM2     | 93.045   | 67.499 | 9        |
| O43493            | Trans-Golgi network integral membrane protein 2 OS=Homo sapiens GN=TGOLN2                         | TGOLN2    | 51.112   | 35.819 | 5        |
| O43505            | Beta-1,4-glucuronyltransferase 1 OS=Homo sapiens GN=B4GAT1                                        | B4GAT1    | 47.119   | 43.726 | 3        |
| O43866            | CD5 antigen-like OS=Homo sapiens GN=CD5L                                                          | CD5L      | 38.087   | 105.39 | 10       |
| O60234            | Glia maturation factor gamma OS=Homo sapiens GN=GMFG                                              | GMFG      | 16.801   | 13.225 | 2        |
| O60462            | Neuropilin-2 OS=Homo sapiens GN=NRP2                                                              | NRP2      | 104.86   | 64.358 | 6        |
| O60641            | Clathrin coat assembly protein AP180 OS=Homo sapiens GN=SNAP91                                    | SNAP91    | 92.501   | 23.207 | 3        |
| O60832            | H/ACA ribonucleoprotein complex subunit 4 OS=Homo sapiens GN=DKC1                                 | DKC1      | 57.673   | 6.4304 | 1        |
| O75144            | ICOS ligand OS=Homo sapiens GN=ICOSLG                                                             | ICOSLG    | 33.348   | 38.771 | 2        |
| O75356            | Ectonucleoside triphosphate diphosphohydrolase 5 OS=Homo sapiens GN=ENTPD5                        | ENTPD5    | 47.517   | 6.2133 | 1        |
| O75636            | Ficolin-3 OS=Homo sapiens GN=FCN3                                                                 | FCN3      | 32.903   | 68.074 | 7        |
| O75882            | Attractin OS=Homo sapiens GN=ATRN                                                                 | ATRN      | 158.54   | 323.31 | 34       |
| O75891            | Cytosolic 10-formyltetrahydrofolate dehydrogenase OS=Homo sapiens GN=ALDH1L1                      | ALDH1L1   | 98.828   | 7.1455 | 1        |
| O94769            | Extracellular matrix protein 2 OS=Homo sapiens GN=ECM2                                            | ECM2      | 79.788   | 7.0901 | 1        |
| O95274            | Ly6/PLAUR domain-containing protein 3 OS=Homo sapiens GN=LYPD3                                    | LYPD3     | 35.97    | 6.2181 | 1        |
| O95428            | Papilin OS=Homo sapiens GN=PAPLN                                                                  | PAPLN     | 137.7    | 24.535 | 3        |
| O95445            | Apolipoprotein M OS=Homo sapiens GN=APOM                                                          | APOM      | 21.253   | 56.881 | 3        |
| O95479            | GDH/6PGL endoplasmic bifunctional protein OS=Homo sapiens GN=H6PD                                 | H6PD      | 88.892   | 67.667 | 8        |
| O95497            | Pantetheinase OS=Homo sapiens GN=VNN1                                                             | VNN1      | 57.011   | 14.966 | 1        |
| O95563            | Mitochondrial pyruvate carrier 2 OS=Homo sapiens GN=MPC2                                          | MPC2      | 14.279   | 14.461 | 1        |
| O95670            | V-type proton ATPase subunit G 2 OS=Homo sapiens GN=ATP6V1G2                                      | ATP6V1G2  | 13.604   | 34.516 | 1        |
| O95897            | Noelin-2 OS=Homo sapiens GN=OLFM2                                                                 | OLFM2     | 51.386   | 7.466  | 1        |
| O95967            | EGF-containing fibulin-like extracellular matrix protein 2 OS=Homo sapiens GN=EFEMP2              | EFEMP2    | 49.405   | 34.197 | 2        |
| O95980            | Reversion-inducing cysteine-rich protein with Kazal motifs OS=Homo sapiens GN=RECK                | RECK      | 106.46   | 16.874 | 2        |
| O95998            | Interleukin-18-binding protein OS=Homo sapiens GN=IL18BP                                          | IL18BP    | 21.099   | 13.751 | 2        |
| P00167            | Cytochrome b5 OS=Homo sapiens GN=CYB5A                                                            | CYB5A     | 15.33    | 7.0425 | 1        |
| P00325            | Alcohol dehydrogenase 1B OS=Homo sapiens GN=ADH1B                                                 | ADH1B     | 39.854   | 18.944 | 3        |
| P00338            | L-lactate dehydrogenase A chain OS=Homo sapiens GN=LDHA                                           | LDHA      | 36.688   | 63.298 | 6        |
| P00352            | Retinal dehydrogenase 1 OS=Homo sapiens GN=ALDH1A1                                                | ALDH1A1   | 54.861   | 32.536 | 4        |
| P00441            | Superoxide dismutase [Cu-Zn] OS=Homo sapiens GN=SOD1                                              | SOD1      | 15.936   | 33.18  | 2        |
| P00450            | Ceruloplasmin OS=Homo sapiens GN=CP                                                               | CP        | 122.2    | 323.31 | 38       |
| P00451            | Coagulation factor VIII OS=Homo sapiens GN=F8                                                     | F8        | 267.01   | 23.248 | 4        |
| P00488            | Coagulation factor XIII A chain OS=Homo sapiens GN=F13A1                                          | F13A1     | 83.266   | 85.568 | 8        |
| P00491            | Purine nucleoside phosphorylase OS=Homo sapiens GN=PNP                                            | PNP       | 32.118   | 36.119 | 4        |
| P00492            | Hypoxanthine-guanine phosphoribosyltransferase OS=Homo sapiens GN=HPRT1                           | HPRT1     | 24.579   | 19.136 | 2        |
| P00533            | Epidermal growth factor receptor OS=Homo sapiens GN=EGFR                                          | EGFR      | 134.28   | 17.916 | 3        |
| P00558            | Phosphoglycerate kinase 1 OS=Homo sapiens GN=PGK1                                                 | PGK1      | 44.614   | 136.66 | 11       |
| P00568            | Adenylate kinase isoenzyme 1 OS=Homo sapiens GN=AK1                                               | AK1       | 21.635   | 26.423 | 3        |
| P00709            | Alpha-lactalbumin OS=Homo sapiens GN=LALBA                                                        | LALBA     | 16.225   | 6.3777 | 1        |
| P00734            | Prothrombin OS=Homo sapiens GN=F2                                                                 | F2        | 70.036   | 323.31 | 31       |
| P00736            | Complement C1r subcomponent OS=Homo sapiens GN=C1R                                                | C1R       | 80.118   | 323.31 | 21       |
| P00738            | Haptoglobin OS=Homo sapiens GN=HP                                                                 | HP        | 45.205   | 323.31 | 22       |
| P00740            | Coagulation factor IX OS=Homo sapiens GN=F9                                                       | F9        | 51.778   | 323.31 | 10       |
| P00742            | Coagulation factor X OS=Homo sapiens GN=F10                                                       | F10       | 54.731   | 323.31 | 15       |
| P00746            | Complement factor D OS=Homo sapiens GN=CFD                                                        | CFD       | 27.033   | 132.17 | 3        |
| P00747            | Plasminogen OS=Homo sapiens GN=PLG                                                                | PLG       | 90.568   | 323.31 | 41       |
| P00748            | Coagulation factor XII OS=Homo sapiens GN=F12                                                     | F12       | 67.791   | 210.25 | 10       |
| P00751            | Complement factor B OS=Homo sapiens GN=CFB                                                        | CFB       | 85.532   | 323.31 | 33       |
| P00915            | Carbonic anhydrase 1 OS=Homo sapiens GN=CA1                                                       | CA1       | 28.87    | 312.95 | 8        |
| P00918            | Carbonic anhydrase 2 OS=Homo sapiens GN=CA2                                                       | CA2       | 29.246   | 100.07 | 6        |
| P01008            | Antithrombin-III OS=Homo sapiens GN=SERPINC1                                                      | SERPINC1  | 52.602   | 323.31 | 19       |
| P01009            | Alpha-1-antitrypsin OS=Homo sapiens GN=SERPINA1                                                   | SERPINA1  | 46.736   | 323.31 | 14       |
| P01011            | Alpha-1-antichymotrypsin OS=Homo sapiens GN=SERPINA3                                              | SERPINA3  | 47.65    | 323.31 | 13       |
| P01019            | Angiotensinogen OS=Homo sapiens GN=AGT                                                            | AGT       | 53.154   | 208.15 | 7        |
| P01023            | Alpha-2-macroglobulin OS=Homo sapiens GN=A2M                                                      | A2M       | 163.29   | 323.31 | 44       |
| P01024            | Complement C3 OS=Homo sapiens GN=C3                                                               | C3        | 187.15   | 323.31 | 90       |
| P01031            | Complement C5 OS=Homo sapiens GN=C5                                                               | C5        | 188.3    | 323.31 | 52       |
| P01033            | Metalloproteinase inhibitor 1 OS=Homo sapiens GN=TIMP1                                            | TIMP1     | 23.171   | 22.044 | 3        |
| P01034            | Cystatin-C OS=Homo sapiens GN=CST3                                                                | CST3      | 15.799   | 155.25 | 5        |
| P01040            | Cystatin-A OS=Homo sapiens GN=CSTA                                                                | CSTA      | 11.006   | 7.7357 | 1        |
| P01042            | Kininogen-1 OS=Homo sapiens GN=KNG1                                                               | KNG1      | 71.957   | 323.31 | 28       |
| P01116            | GTPase KRas OS=Homo sapiens GN=KRAS                                                               | KRAS      | 21.656   | 17.711 | 1        |
| P01130            | Low-density lipoprotein receptor OS=Homo sapiens GN=LDLR                                          | LDLR      | 95.375   | 6.2537 | 1        |
| P01137            | Transforming growth factor beta-1 OS=Homo sapiens GN=TGFB1                                        | TGFB1     | 44.341   | 7.2306 | 1        |

|        |                                                                          |          |        |        |     |
|--------|--------------------------------------------------------------------------|----------|--------|--------|-----|
| P01344 | Insulin-like growth factor II OS=Homo sapiens GN=IGF2                    | IGF2     | 20.14  | 54.22  | 3   |
| P01591 | Immunoglobulin J chain OS=Homo sapiens GN=JCHAIN                         | JCHAIN   | 18.098 | 29.367 | 3   |
| P01602 | Immunoglobulin kappa variable 1-5 OS=Homo sapiens GN=IGKV1-5             | IGKV1-5  | 12.781 | 6.9311 | 1   |
| P01701 | Immunoglobulin lambda variable 1-51 OS=Homo sapiens GN=IGLV1-51          | IGLV1-51 | 12.249 | 12.199 | 2   |
| P01714 | Immunoglobulin lambda variable 3-19 OS=Homo sapiens GN=IGLV3-19          | IGLV3-19 | 12.042 | 12.658 | 2   |
| P01780 | Immunoglobulin heavy variable 3-7 OS=Homo sapiens GN=IGHV3-7             | IGHV3-7  | 12.943 | 17.271 | 2   |
| P01834 | Ig kappa chain C region OS=Homo sapiens GN=IGKC                          | IGKC     | 11.609 | 205.04 | 3   |
| P01857 | Ig gamma-1 chain C region OS=Homo sapiens GN=IGHG1                       | IGHG1    | 36.105 | 226.55 | 10  |
| P01859 | Ig gamma-2 chain C region OS=Homo sapiens GN=IGHG2                       | IGHG2    | 35.9   | 6.2103 | 6   |
| P01860 | Ig gamma-3 chain C region OS=Homo sapiens GN=IGHG3                       | IGHG3    | 41.287 | 52.871 | 9   |
| P01861 | Ig gamma-4 chain C region OS=Homo sapiens GN=IGHG4                       | IGHG4    | 35.94  | 57.237 | 6   |
| P01871 | Ig mu chain C region OS=Homo sapiens GN=IGHM                             | IGHM     | 49.306 | 323.31 | 15  |
| P01876 | Ig alpha-1 chain C region OS=Homo sapiens GN=IGHA1                       | IGHA1    | 37.654 | 164.99 | 7   |
| P01877 | Ig alpha-2 chain C region OS=Homo sapiens GN=IGHA2                       | IGHA2    | 36.526 | 21.457 | 6   |
| P02042 | Hemoglobin subunit delta OS=Homo sapiens GN=HBD                          | HBD      | 16.055 | 96.689 | 10  |
| P02144 | Myoglobin OS=Homo sapiens GN=MB                                          | MB       | 17.184 | 7.3267 | 1   |
| P02452 | Collagen alpha-1(I) chain OS=Homo sapiens GN=COL1A1                      | COL1A1   | 138.94 | 96.393 | 10  |
| P02458 | Collagen alpha-1(II) chain OS=Homo sapiens GN=COL2A1                     | COL2A1   | 141.78 | 73.199 | 5   |
| P02549 | Spectrin alpha chain, erythrocytic 1 OS=Homo sapiens GN=SPTA1            | SPTA1    | 280.01 | 121.51 | 13  |
| P02647 | Apolipoprotein A-I OS=Homo sapiens GN=APOA1                              | APOA1    | 30.777 | 323.31 | 24  |
| P02649 | Apolipoprotein E OS=Homo sapiens GN=APOE                                 | APOE     | 36.154 | 323.31 | 20  |
| P02652 | Apolipoprotein A-II OS=Homo sapiens GN=APOA2                             | APOA2    | 11.175 | 32.979 | 4   |
| P02654 | Apolipoprotein C-I OS=Homo sapiens GN=APOC1                              | APOC1    | 9.3318 | 61.452 | 5   |
| P02655 | Apolipoprotein C-II OS=Homo sapiens GN=APOC2                             | APOC2    | 11.284 | 32.549 | 3   |
| P02656 | Apolipoprotein C-III OS=Homo sapiens GN=APOC3                            | APOC3    | 10.852 | 186.4  | 3   |
| P02671 | Fibrinogen alpha chain OS=Homo sapiens GN=FGA                            | FGA      | 94.972 | 323.31 | 28  |
| P02675 | Fibrinogen beta chain OS=Homo sapiens GN=FGB                             | FGB      | 55.928 | 323.31 | 27  |
| P02679 | Fibrinogen gamma chain OS=Homo sapiens GN=FGG                            | FGG      | 51.511 | 323.31 | 19  |
| P02730 | Band 3 anion transport protein OS=Homo sapiens GN=SLC4A1                 | SLC4A1   | 101.79 | 32.374 | 5   |
| P02741 | C-reactive protein OS=Homo sapiens GN=CRP                                | CRP      | 25.038 | 7.3268 | 1   |
| P02743 | Serum amyloid P-component OS=Homo sapiens GN=APCS                        | APCS     | 25.387 | 112.88 | 6   |
| P02745 | Complement C1q subcomponent subunit A OS=Homo sapiens GN=C1QA            | C1QA     | 26.016 | 20.216 | 2   |
| P02746 | Complement C1q subcomponent subunit B OS=Homo sapiens GN=C1QB            | C1QB     | 26.721 | 137.41 | 3   |
| P02747 | Complement C1q subcomponent subunit C OS=Homo sapiens GN=C1QC            | C1QC     | 25.773 | 173.92 | 4   |
| P02748 | Complement component C9 OS=Homo sapiens GN=C9                            | C9       | 63.173 | 323.31 | 16  |
| P02749 | Beta-2-glycoprotein 1 OS=Homo sapiens GN=APOH                            | APOH     | 38.298 | 323.31 | 19  |
| P02750 | Leucine-rich alpha-2-glycoprotein OS=Homo sapiens GN=LRG1                | LRG1     | 38.177 | 149.1  | 8   |
| P02751 | Fibronectin OS=Homo sapiens GN=FN1                                       | FN1      | 262.62 | 323.31 | 34  |
| P02753 | Retinol-binding protein 4 OS=Homo sapiens GN=RBP4                        | RBP4     | 23.01  | 75.542 | 4   |
| P02760 | Protein AMBP OS=Homo sapiens GN=AMBP                                     | AMBP     | 38.999 | 323.31 | 12  |
| P02763 | Alpha-1-acid glycoprotein 1 OS=Homo sapiens GN=ORM1                      | ORM1     | 23.511 | 98.287 | 6   |
| P02765 | Alpha-2-HS-glycoprotein OS=Homo sapiens GN=AHSG                          | AHSG     | 39.324 | 323.31 | 9   |
| P02766 | Transthyretin OS=Homo sapiens GN=TTR                                     | TTR      | 15.887 | 87.643 | 3   |
| P02774 | Vitamin D-binding protein OS=Homo sapiens GN=GC                          | GC       | 52.963 | 323.31 | 25  |
| P02775 | Platelet basic protein OS=Homo sapiens GN=PPBP                           | PPBP     | 13.894 | 50.371 | 6   |
| P02776 | Platelet factor 4 OS=Homo sapiens GN=PF4                                 | PF4      | 10.845 | 8.2302 | 3   |
| P02786 | Transferrin receptor protein 1 OS=Homo sapiens GN=TFRC                   | TFRC     | 84.87  | 62.244 | 9   |
| P02787 | Serotransferrin OS=Homo sapiens GN=TF                                    | TF       | 77.063 | 323.31 | 34  |
| P02788 | Lactotransferrin OS=Homo sapiens GN=LTF                                  | LTF      | 78.181 | 48.91  | 4   |
| P02790 | Hemopexin OS=Homo sapiens GN=HPX                                         | HPX      | 51.676 | 323.31 | 21  |
| P02810 | Salivary acidic proline-rich phosphoprotein 1/2 OS=Homo sapiens GN=PRH1  | PRH1     | 17.016 | 8.3196 | 1   |
| P03950 | Angiogenin OS=Homo sapiens GN=ANG                                        | ANG      | 16.55  | 21.691 | 3   |
| P03951 | Coagulation factor XI OS=Homo sapiens GN=F11                             | F11      | 70.108 | 301.9  | 20  |
| P03952 | Plasma kallikrein OS=Homo sapiens GN=KLKB1                               | KLKB1    | 71.369 | 323.31 | 29  |
| P03973 | Antileukoprotease OS=Homo sapiens GN=SLPI                                | SLPI     | 14.326 | 7.1151 | 1   |
| P04003 | C4b-binding protein alpha chain OS=Homo sapiens GN=C4BPA                 | C4BPA    | 67.033 | 323.31 | 22  |
| P04004 | Vitronectin OS=Homo sapiens GN=VTN                                       | VTN      | 54.305 | 323.31 | 18  |
| P04040 | Catalase OS=Homo sapiens GN=CAT                                          | CAT      | 59.755 | 267.16 | 17  |
| P04066 | Tissue alpha-L-fucosidase OS=Homo sapiens GN=FUCA1                       | FUCA1    | 53.688 | 10.647 | 2   |
| P04070 | Vitamin K-dependent protein C OS=Homo sapiens GN=PROC                    | PROC     | 52.071 | 48.781 | 6   |
| P04075 | Fructose-bisphosphate aldolase A OS=Homo sapiens GN=ALDOA                | ALDOA    | 39.42  | 219.47 | 9   |
| P04114 | Apolipoprotein B-100 OS=Homo sapiens GN=APOB                             | APOB     | 515.6  | 323.31 | 182 |
| P04180 | Phosphatidylcholine-sterol acyltransferase OS=Homo sapiens GN=LCAT       | LCAT     | 49.577 | 90.021 | 7   |
| P04196 | Histidine-rich glycoprotein OS=Homo sapiens GN=HRG                       | HRG      | 59.578 | 323.31 | 16  |
| P04217 | Alpha-1B-glycoprotein OS=Homo sapiens GN=A1BG                            | A1BG     | 54.253 | 226.94 | 9   |
| P04275 | von Willebrand factor OS=Homo sapiens GN=VWF                             | VWF      | 309.26 | 323.31 | 56  |
| P04278 | Sex hormone-binding globulin OS=Homo sapiens GN=SHBG                     | SHBG     | 43.779 | 108.69 | 7   |
| P04406 | Glyceraldehyde-3-phosphate dehydrogenase OS=Homo sapiens GN=GAPDH        | GAPDH    | 36.053 | 82.064 | 6   |
| P04424 | Argininosuccinate lyase OS=Homo sapiens GN=ASL                           | ASL      | 51.657 | 9.7413 | 1   |
| P04433 | Immunoglobulin kappa variable 3-11 OS=Homo sapiens GN=IGKV3-11           | IGKV3-11 | 12.575 | 6.2181 | 1   |
| P04792 | Heat shock protein beta-1 OS=Homo sapiens GN=HSPB1                       | HSPB1    | 22.782 | 8.7538 | 1   |
| P05019 | Insulin-like growth factor I OS=Homo sapiens GN=IGF1                     | IGF1     | 21.841 | 6.9388 | 1   |
| P05060 | Secretogranin-1 OS=Homo sapiens GN=CHGB                                  | CHGB     | 78.275 | 8.107  | 1   |
| P05062 | Fructose-bisphosphate aldolase B OS=Homo sapiens GN=ALDOB                | ALDOB    | 39.473 | 63.903 | 8   |
| P05067 | Amyloid beta A4 protein OS=Homo sapiens GN=APP                           | APP      | 86.942 | 21.046 | 2   |
| P05089 | Arginase-1 OS=Homo sapiens GN=ARG1                                       | ARG1     | 34.735 | 13.365 | 2   |
| P05090 | Apolipoprotein D OS=Homo sapiens GN=APOD                                 | APOD     | 21.275 | 123.67 | 6   |
| P05106 | Integrin beta-3 OS=Homo sapiens GN=ITGB3                                 | ITGB3    | 87.057 | 15.725 | 2   |
| P05107 | Integrin beta-2 OS=Homo sapiens GN=ITGB2                                 | ITGB2    | 84.781 | 11.218 | 2   |
| P05109 | Protein S100-A8 OS=Homo sapiens GN=S100A8                                | S100A8   | 10.834 | 36.96  | 5   |
| P05154 | Plasma serine protease inhibitor OS=Homo sapiens GN=SERPINA5             | SERPINA5 | 45.674 | 203.92 | 11  |
| P05155 | Plasma protease C1 inhibitor OS=Homo sapiens GN=SERPING1                 | SERPING1 | 55.154 | 323.31 | 13  |
| P05156 | Complement factor I OS=Homo sapiens GN=CFI                               | CFI      | 65.75  | 323.31 | 16  |
| P05164 | Myeloperoxidase OS=Homo sapiens GN=MPO                                   | MPO      | 83.868 | 11.391 | 2   |
| P05186 | Alkaline phosphatase, tissue-nonspecific isozyme OS=Homo sapiens GN=ALPL | ALPL     | 57.304 | 46.479 | 3   |
| P05362 | Intercellular adhesion molecule 1 OS=Homo sapiens GN=ICAM1               | ICAM1    | 57.825 | 174.69 | 9   |
| P05451 | Lithostathine-1-alpha OS=Homo sapiens GN=REG1A                           | REG1A    | 18.731 | 11.552 | 2   |
| P05543 | Thyroxine-binding globulin OS=Homo sapiens GN=SERPINA7                   | SERPINA7 | 46.324 | 263.29 | 9   |
| P05546 | Heparin cofactor 2 OS=Homo sapiens GN=SERPIND1                           | SERPIND1 | 57.07  | 228.44 | 14  |

|        |                                                                                             |          |        |        |    |
|--------|---------------------------------------------------------------------------------------------|----------|--------|--------|----|
| P05556 | Integrin beta-1 OS=Homo sapiens GN=ITGB1                                                    | ITGB1    | 88.414 | 82.705 | 9  |
| P05997 | Collagen alpha-2(V) chain OS=Homo sapiens GN=COL5A2                                         | COL5A2   | 144.91 | 6.7274 | 2  |
| P06276 | Cholinesterase OS=Homo sapiens GN=BCHE                                                      | BCHE     | 68.417 | 118.5  | 9  |
| P06312 | Immunoglobulin kappa variable 4-1 OS=Homo sapiens GN=IGKV4-1                                | IGKV4-1  | 13.38  | 7.1605 | 1  |
| P06576 | ATP synthase subunit beta, mitochondrial OS=Homo sapiens GN=ATP5B                           | ATP5B    | 56.559 | 22.288 | 1  |
| P06681 | Complement C2 OS=Homo sapiens GN=C2                                                         | C2       | 83.267 | 323.31 | 23 |
| P06702 | Protein S100-A9 OS=Homo sapiens GN=S100A9                                                   | S100A9   | 13.242 | 62.968 | 6  |
| P06727 | Apolipoprotein A-IV OS=Homo sapiens GN=APOA4                                                | APOA4    | 45.398 | 323.31 | 33 |
| P06732 | Creatine kinase M-type OS=Homo sapiens GN=CKM                                               | CKM      | 43.101 | 31.829 | 5  |
| P06733 | Alpha-enolase OS=Homo sapiens GN=ENO1                                                       | ENO1     | 47.168 | 69.109 | 8  |
| P06753 | Tropomyosin alpha-3 chain OS=Homo sapiens GN=TPM3                                           | TPM3     | 32.95  | 23.138 | 3  |
| P07148 | Fatty acid-binding protein, liver OS=Homo sapiens GN=FABP1                                  | FABP1    | 14.208 | 16.046 | 2  |
| P07195 | L-lactate dehydrogenase B chain OS=Homo sapiens GN=LDHB                                     | LDHB     | 36.638 | 20.779 | 4  |
| P07196 | Neurofilament light polypeptide OS=Homo sapiens GN=NEFL                                     | NEFL     | 61.516 | 98.132 | 1  |
| P07225 | Vitamin K-dependent protein S OS=Homo sapiens GN=PROS1                                      | PROS1    | 75.122 | 323.31 | 20 |
| P07237 | Protein disulfide-isomerase OS=Homo sapiens GN=P4HB                                         | P4HB     | 57.116 | 52.312 | 7  |
| P07307 | Asialoglycoprotein receptor 2 OS=Homo sapiens GN=ASGR2                                      | ASGR2    | 35.092 | 11.015 | 2  |
| P07327 | Alcohol dehydrogenase 1A OS=Homo sapiens GN=ADH1A                                           | ADH1A    | 39.858 | 6.2103 | 3  |
| P07333 | Macrophage colony-stimulating factor 1 receptor OS=Homo sapiens GN=CSF1R                    | CSF1R    | 107.98 | 35.907 | 3  |
| P07339 | Cathepsin D OS=Homo sapiens GN=CTSD                                                         | CTSD     | 44.552 | 93.044 | 7  |
| P07355 | Annexin A2 OS=Homo sapiens GN=ANXA2                                                         | ANXA2    | 38.604 | 11.004 | 2  |
| P07357 | Complement component C8 alpha chain OS=Homo sapiens GN=C8A                                  | C8A      | 65.163 | 323.31 | 18 |
| P07358 | Complement component C8 beta chain OS=Homo sapiens GN=C8B                                   | C8B      | 67.046 | 292.77 | 18 |
| P07359 | Platelet glycoprotein Ib alpha chain OS=Homo sapiens GN=GP1BA                               | GP1BA    | 71.539 | 110.65 | 5  |
| P07360 | Complement component C8 gamma chain OS=Homo sapiens GN=C8G                                  | C8G      | 22.277 | 240.2  | 9  |
| P07451 | Carbonic anhydrase 3 OS=Homo sapiens GN=CA3                                                 | CA3      | 29.557 | 14.031 | 1  |
| P07476 | Involucrin OS=Homo sapiens GN=IVL                                                           | IVL      | 68.478 | 6.6416 | 1  |
| P07585 | Decorin OS=Homo sapiens GN=DCN                                                              | DCN      | 39.746 | 11.836 | 2  |
| P07602 | Prosaposin OS=Homo sapiens GN=PSAP                                                          | PSAP     | 58.112 | 42.48  | 7  |
| P07686 | Beta-hexosaminidase subunit beta OS=Homo sapiens GN=HEXB                                    | HEXB     | 63.111 | 13.224 | 2  |
| P07711 | Cathepsin L1 OS=Homo sapiens GN=CTSL                                                        | CTSL     | 37.564 | 8.9293 | 1  |
| P07737 | Profilin-1 OS=Homo sapiens GN=PFN1                                                          | PFN1     | 15.054 | 58.58  | 5  |
| P07738 | Bisphosphoglycerate mutase OS=Homo sapiens GN=BPGM                                          | BPGM     | 30.005 | 53.886 | 5  |
| P07858 | Cathepsin B OS=Homo sapiens GN=CTSB                                                         | CTSB     | 37.821 | 18.814 | 3  |
| P07900 | Heat shock protein HSP 90-alpha OS=Homo sapiens GN=HSP90AA1                                 | HSP90AA1 | 84.659 | 63.321 | 6  |
| P07911 | Uromodulin OS=Homo sapiens GN=UMOD                                                          | UMOD     | 69.76  | 27.03  | 4  |
| P07942 | Laminin subunit beta-1 OS=Homo sapiens GN=LAMB1                                             | LAMB1    | 198.04 | 112.48 | 13 |
| P08123 | Collagen alpha-2(I) chain OS=Homo sapiens GN=COL1A2                                         | COL1A2   | 129.31 | 44.432 | 4  |
| P08174 | Complement decay-accelerating factor OS=Homo sapiens GN=CD55                                | CD55     | 41.4   | 50.408 | 7  |
| P08185 | Corticosteroid-binding globulin OS=Homo sapiens GN=SERPINA6                                 | SERPINA6 | 45.14  | 237.72 | 7  |
| P08195 | 4F2 cell-surface antigen heavy chain OS=Homo sapiens GN=SLC3A2                              | SLC3A2   | 67.993 | 131.02 | 9  |
| P08253 | 72 kDa type IV collagenase OS=Homo sapiens GN=MMP2                                          | MMP2     | 73.881 | 103.61 | 10 |
| P08294 | Extracellular superoxide dismutase [Cu-Zn] OS=Homo sapiens GN=SOD3                          | SOD3     | 25.851 | 79.496 | 4  |
| P08493 | Matrix Gla protein OS=Homo sapiens GN=MGP                                                   | MGP      | 12.353 | 10.86  | 1  |
| P08514 | Integrin alpha-IIb OS=Homo sapiens GN=ITGA2B                                                | ITGA2B   | 113.38 | 6.6313 | 1  |
| P08519 | Apolipoprotein(a) OS=Homo sapiens GN=LPA                                                    | LPA      | 501.31 | 323.31 | 18 |
| P08571 | Monocyte differentiation antigen CD14 OS=Homo sapiens GN=CD14                               | CD14     | 40.076 | 190.59 | 8  |
| P08581 | Hepatocyte growth factor receptor OS=Homo sapiens GN=MET                                    | MET      | 155.54 | 26.86  | 4  |
| P08603 | Complement factor H OS=Homo sapiens GN=CFH                                                  | CFH      | 139.09 | 323.31 | 52 |
| P08637 | Low affinity immunoglobulin gamma Fc region receptor III-A OS=Homo sapiens GN=FCGR3A        | FCGR3A   | 29.089 | 20.366 | 3  |
| P08697 | Alpha-2-antiplasmin OS=Homo sapiens GN=SERPINF2                                             | SERPINF2 | 54.565 | 323.31 | 17 |
| P08709 | Coagulation factor VII OS=Homo sapiens GN=F7                                                | F7       | 51.593 | 24.817 | 3  |
| P08887 | Interleukin-6 receptor subunit alpha OS=Homo sapiens GN=IL6R                                | IL6R     | 51.547 | 12.599 | 2  |
| P09172 | Dopamine beta-hydroxylase OS=Homo sapiens GN=DBH                                            | DBH      | 69.064 | 101.46 | 7  |
| P09211 | Glutathione S-transferase P OS=Homo sapiens GN=GSTP1                                        | GSTP1    | 23.356 | 11.575 | 2  |
| P09382 | Galectin-1 OS=Homo sapiens GN=LGALS1                                                        | LGALS1   | 14.716 | 11.92  | 2  |
| P09486 | SPARC OS=Homo sapiens GN=SPARC                                                              | SPARC    | 34.632 | 93.372 | 7  |
| P09603 | Macrophage colony-stimulating factor 1 OS=Homo sapiens GN=CSF1                              | CSF1     | 60.179 | 7.1623 | 1  |
| P09668 | Pro-cathepsin H OS=Homo sapiens GN=CTSH                                                     | CTSH     | 37.393 | 13.83  | 2  |
| P09681 | Gastric inhibitory polypeptide OS=Homo sapiens GN=GIP                                       | GIP      | 17.107 | 7.0598 | 1  |
| P09871 | Complement C1s subcomponent OS=Homo sapiens GN=C1S                                          | C1S      | 76.684 | 323.31 | 17 |
| P09960 | Leukotriene A-4 hydrolase OS=Homo sapiens GN=LTA4H                                          | LTA4H    | 69.284 | 86.211 | 7  |
| P09972 | Fructose-bisphosphate aldolase C OS=Homo sapiens GN=ALDOC                                   | ALDOC    | 39.455 | 93.839 | 3  |
| P0C0L4 | Complement C4-A OS=Homo sapiens GN=C4A                                                      | C4A      | 192.78 | 323.31 | 64 |
| P0C0L5 | Complement C4-B OS=Homo sapiens GN=C4B                                                      | C4B      | 192.75 | 82.739 | 62 |
| P0CG06 | Ig lambda-3 chain C regions OS=Homo sapiens GN=IGLC3                                        | IGLC3    | 11.237 | 73.556 | 4  |
| P0DJ19 | Serum amyloid A-2 protein OS=Homo sapiens GN=SAA2                                           | SAA2     | 13.527 | 15.484 | 2  |
| P10124 | Seryglycin OS=Homo sapiens GN=SRGN                                                          | SRGN     | 17.652 | 18.851 | 1  |
| P10253 | Lysosomal alpha-glucosidase OS=Homo sapiens GN=GAA                                          | GAA      | 105.32 | 6.5313 | 1  |
| P10451 | Osteopontin OS=Homo sapiens GN=SPP1                                                         | SPP1     | 35.422 | 39.036 | 1  |
| P10586 | Receptor-type tyrosine-protein phosphatase F OS=Homo sapiens GN=PTPRF                       | PTPRF    | 212.88 | 78.661 | 9  |
| P10599 | Thioredoxin OS=Homo sapiens GN=TXN                                                          | TXN      | 11.737 | 43.665 | 4  |
| P10619 | Lysosomal protective protein OS=Homo sapiens GN=CTSA                                        | CTSA     | 54.465 | 11.32  | 1  |
| P10643 | Complement component C7 OS=Homo sapiens GN=C7                                               | C7       | 93.517 | 323.31 | 23 |
| P10645 | Chromogranin-A OS=Homo sapiens GN=CHGA                                                      | CHGA     | 50.688 | 18.506 | 2  |
| P10646 | Tissue factor pathway inhibitor OS=Homo sapiens GN=TFPI                                     | TFPI     | 35.015 | 77.351 | 4  |
| P10720 | Platelet factor 4 variant OS=Homo sapiens GN=PF4V1                                          | PF4V1    | 11.553 | 58.231 | 3  |
| P10721 | Mast/stem cell growth factor receptor Kit OS=Homo sapiens GN=KIT                            | KIT      | 109.86 | 35.664 | 4  |
| P10768 | S-formylglutathione hydrolase OS=Homo sapiens GN=ESD                                        | ESD      | 31.462 | 12.695 | 2  |
| P10909 | Clusterin OS=Homo sapiens GN=CLU                                                            | CLU      | 52.494 | 312.15 | 11 |
| P10912 | Growth hormone receptor OS=Homo sapiens GN=GHR                                              | GHR      | 71.499 | 6.2131 | 1  |
| P11021 | 78 kDa glucose-regulated protein OS=Homo sapiens GN=HSPA5                                   | HSPA5    | 72.332 | 158.44 | 14 |
| P11047 | Laminin subunit gamma-1 OS=Homo sapiens GN=LAMC1                                            | LAMC1    | 177.6  | 34.045 | 5  |
| P11142 | Heat shock cognate 71 kDa protein OS=Homo sapiens GN=HSPA8                                  | HSPA8    | 70.897 | 76.868 | 9  |
| P11150 | Hepatic triacylglycerol lipase OS=Homo sapiens GN=LIPC                                      | LIPC     | 55.914 | 20.552 | 1  |
| P11166 | Solute carrier family 2, facilitated glucose transporter member 1 OS=Homo sapiens GN=SLC2A1 | SLC2A1   | 54.083 | 7.5988 | 1  |
| P11226 | Mannose-binding protein C OS=Homo sapiens GN=MBL2                                           | MBL2     | 26.143 | 131.76 | 5  |
| P11277 | Spectrin beta chain, erythrocytic OS=Homo sapiens GN=SPTB                                   | SPTB     | 246.47 | 52.081 | 7  |
| P11279 | Lysosome-associated membrane glycoprotein 1 OS=Homo sapiens GN=LAMP1                        | LAMP1    | 44.882 | 36.589 | 3  |

|        |                                                                                   |          |        |        |    |
|--------|-----------------------------------------------------------------------------------|----------|--------|--------|----|
| P11488 | Guanine nucleotide-binding protein G(t) subunit alpha-1 OS=Homo sapiens GN=GNAT1  | GNAT1    | 40.04  | 6.8539 | 1  |
| P11597 | Cholesteryl ester transfer protein OS=Homo sapiens GN=CETP                        | CETP     | 54.756 | 35.281 | 4  |
| P11717 | Cation-independent mannose-6-phosphate receptor OS=Homo sapiens GN=IGF2R          | IGF2R    | 274.37 | 95.419 | 13 |
| P12107 | Collagen alpha-1(XI) chain OS=Homo sapiens GN=COL11A1                             | COL11A1  | 181.06 | 7.2489 | 1  |
| P12109 | Collagen alpha-1(VI) chain OS=Homo sapiens GN=COL6A1                              | COL6A1   | 108.53 | 84.182 | 6  |
| P12111 | Collagen alpha-3(VI) chain OS=Homo sapiens GN=COL6A3                              | COL6A3   | 343.67 | 263.35 | 25 |
| P12259 | Coagulation factor V OS=Homo sapiens GN=F5                                        | F5       | 251.7  | 323.31 | 44 |
| P12273 | Prolactin-inducible protein OS=Homo sapiens GN=PIP                                | PIP      | 16.572 | 15.436 | 2  |
| P12814 | Alpha-actinin-1 OS=Homo sapiens GN=ACTN1                                          | ACTN1    | 103.06 | 11.837 | 1  |
| P12821 | Angiotensin-converting enzyme OS=Homo sapiens GN=ACE                              | ACE      | 149.71 | 46.706 | 7  |
| P12830 | Cadherin-1 OS=Homo sapiens GN=CDH1                                                | CDH1     | 97.455 | 74.868 | 6  |
| P12955 | Xaa-Pro dipeptidase OS=Homo sapiens GN=PEPD                                       | PEPD     | 54.548 | 47.403 | 6  |
| P13473 | Lysosome-associated membrane glycoprotein 2 OS=Homo sapiens GN=LAMP2              | LAMP2    | 44.96  | 6.2206 | 1  |
| P13489 | Ribonuclease inhibitor OS=Homo sapiens GN=RNH1                                    | RNH1     | 49.973 | 21.575 | 3  |
| P13497 | Bone morphogenetic protein 1 OS=Homo sapiens GN=BMP1                              | BMP1     | 111.25 | 7.7392 | 1  |
| P13591 | Neural cell adhesion molecule 1 OS=Homo sapiens GN=NCAM1                          | NCAM1    | 94.573 | 211.27 | 17 |
| P13598 | Intercellular adhesion molecule 2 OS=Homo sapiens GN=ICAM2                        | ICAM2    | 30.654 | 7.3268 | 1  |
| P13611 | Versican core protein OS=Homo sapiens GN=VCAN                                     | VCAN     | 372.82 | 19.393 | 3  |
| P13637 | Sodium/potassium-transporting ATPase subunit alpha-3 OS=Homo sapiens GN=ATP1A3    | ATP1A3   | 111.75 | 55.214 | 2  |
| P13671 | Complement component C6 OS=Homo sapiens GN=C6                                     | C6       | 104.79 | 323.31 | 31 |
| P13716 | Delta-aminolevulinic acid dehydratase OS=Homo sapiens GN=ALAD                     | ALAD     | 36.294 | 121.32 | 6  |
| P13727 | Bone marrow proteoglycan OS=Homo sapiens GN=PRG2                                  | PRG2     | 25.205 | 12.673 | 2  |
| P13746 | HLA class I histocompatibility antigen, A-11 alpha chain OS=Homo sapiens GN=HLA-A | HLA-A    | 40.936 | 23.086 | 3  |
| P13796 | Plastin-2 OS=Homo sapiens GN=LCP1                                                 | LCP1     | 70.288 | 183.01 | 16 |
| P13797 | Plastin-3 OS=Homo sapiens GN=PLS3                                                 | PLS3     | 70.81  | -2     | 4  |
| P13942 | Collagen alpha-2(XI) chain OS=Homo sapiens GN=COL11A2                             | COL11A2  | 171.79 | 28.904 | 2  |
| P13987 | CD59 glycoprotein OS=Homo sapiens GN=CD59                                         | CD59     | 14.177 | 20.134 | 2  |
| P14151 | L-selectin OS=Homo sapiens GN=SELL                                                | SELL     | 42.187 | 188.06 | 7  |
| P14174 | Macrophage migration inhibitory factor OS=Homo sapiens GN=MIF                     | MIF      | 12.476 | 7.0299 | 1  |
| P14314 | Glucosidase 2 subunit beta OS=Homo sapiens GN=PRKCSH                              | PRKCSH   | 59.425 | 36.022 | 4  |
| P14543 | Nidogen-1 OS=Homo sapiens GN=NID1                                                 | NID1     | 136.38 | 106.99 | 11 |
| P14618 | Pyruvate kinase PKM OS=Homo sapiens GN=PKM                                        | PKM      | 57.936 | 100.66 | 10 |
| P14625 | Endoplasmic reticulum chaperone protein OS=Homo sapiens GN=HSP90B1                | HSP90B1  | 92.468 | 146.09 | 12 |
| P14780 | Matrix metalloproteinase-9 OS=Homo sapiens GN=MMP9                                | MMP9     | 78.457 | 63.123 | 8  |
| P14923 | Junction plakoglobin OS=Homo sapiens GN=JUP                                       | JUP      | 81.744 | 122.73 | 13 |
| P15088 | Mast cell carboxypeptidase A OS=Homo sapiens GN=CPA3                              | CPA3     | 48.669 | 6.3017 | 1  |
| P15144 | Aminopeptidase N OS=Homo sapiens GN=ANPEP                                         | ANPEP    | 109.54 | 150.74 | 14 |
| P15151 | Poliovirus receptor OS=Homo sapiens GN=PVR                                        | PVR      | 45.302 | 19.95  | 2  |
| P15169 | Carboxypeptidase N catalytic chain OS=Homo sapiens GN=CPN1                        | CPN1     | 52.286 | 129.19 | 8  |
| P15924 | Desmoplakin OS=Homo sapiens GN=DSP                                                | DSP      | 331.77 | 285.62 | 35 |
| P16035 | Metalloproteinase inhibitor 2 OS=Homo sapiens GN=TIMP2                            | TIMP2    | 24.399 | 71.867 | 4  |
| P16070 | CD44 antigen OS=Homo sapiens GN=CD44                                              | CD44     | 81.537 | 12.122 | 2  |
| P16109 | P-selectin OS=Homo sapiens GN=SELP                                                | SELP     | 90.833 | 34.015 | 3  |
| P16112 | Aggrecan core protein OS=Homo sapiens GN=ACAN                                     | ACAN     | 250.19 | 59.468 | 5  |
| P16157 | Ankyrin-1 OS=Homo sapiens GN=ANK1                                                 | ANK1     | 206.26 | 76.457 | 9  |
| P16284 | Platelet endothelial cell adhesion molecule OS=Homo sapiens GN=PECAM1             | PECAM1   | 82.535 | 12.022 | 2  |
| P16403 | Histone H1.2 OS=Homo sapiens GN=HIST1H1C                                          | HIST1H1C | 21.364 | 6.6777 | 1  |
| P17066 | Heat shock 70 kDa protein 6 OS=Homo sapiens GN=HSPA6                              | HSPA6    | 71.027 | 27.665 | 4  |
| P17174 | Aspartate aminotransferase, cytoplasmic OS=Homo sapiens GN=GOT1                   | GOT1     | 46.247 | 18.482 | 1  |
| P17301 | Integrin alpha-2 OS=Homo sapiens GN=ITGA2                                         | ITGA2    | 129.29 | 56.65  | 7  |
| P17600 | Synapsin-1 OS=Homo sapiens GN=SYN1                                                | SYN1     | 74.111 | 22.228 | 1  |
| P17813 | Endoglin OS=Homo sapiens GN=ENG                                                   | ENG      | 70.577 | 48.622 | 6  |
| P17858 | ATP-dependent 6-phosphofructokinase, liver type OS=Homo sapiens GN=PFKL           | PFKL     | 85.018 | 21.928 | 2  |
| P17931 | Galectin-3 OS=Homo sapiens GN=LGALS3                                              | LGALS3   | 26.152 | 18.405 | 2  |
| P17936 | Insulin-like growth factor-binding protein 3 OS=Homo sapiens GN=IGFBP3            | IGFBP3   | 31.674 | 295.36 | 14 |
| P17980 | 26S protease regulatory subunit 6A OS=Homo sapiens GN=PSMC3                       | PSMC3    | 49.203 | 6.4578 | 1  |
| P17987 | T-complex protein 1 subunit alpha OS=Homo sapiens GN=TCP1                         | TCP1     | 60.343 | 17.852 | 2  |
| P18065 | Insulin-like growth factor-binding protein 2 OS=Homo sapiens GN=IGFBP2            | IGFBP2   | 34.814 | 60.297 | 5  |
| P18084 | Integrin beta-5 OS=Homo sapiens GN=ITGB5                                          | ITGB5    | 88.053 | 6.4687 | 1  |
| P18206 | Vinculin OS=Homo sapiens GN=VCL                                                   | VCL      | 123.8  | 183.9  | 21 |
| P18428 | Lipopolysaccharide-binding protein OS=Homo sapiens GN=LBP                         | LBP      | 53.383 | 41.685 | 4  |
| P18564 | Integrin beta-6 OS=Homo sapiens GN=ITGB6                                          | ITGB6    | 85.935 | 6.3256 | 1  |
| P18850 | Cyclic AMP-dependent transcription factor ATF-6 alpha OS=Homo sapiens GN=ATF6     | ATF6     | 74.584 | 19.23  | 3  |
| P19021 | Peptidyl-glycine alpha-amidating monooxygenase OS=Homo sapiens GN=PAM             | PAM      | 108.33 | 12.07  | 2  |
| P19022 | Cadherin-2 OS=Homo sapiens GN=CDH2                                                | CDH2     | 99.808 | 34.446 | 5  |
| P19256 | Lymphocyte function-associated antigen 3 OS=Homo sapiens GN=CD58                  | CD58     | 28.147 | 8.1356 | 1  |
| P19320 | Vascular cell adhesion protein 1 OS=Homo sapiens GN=VCAM1                         | VCAM1    | 81.275 | 131.92 | 15 |
| P19367 | Hexokinase-1 OS=Homo sapiens GN=HK1                                               | HK1      | 102.48 | 10.804 | 1  |
| P19652 | Alpha-1-acid glycoprotein 2 OS=Homo sapiens GN=ORM2                               | ORM2     | 23.602 | 102.98 | 6  |
| P19823 | Inter-alpha-trypsin inhibitor heavy chain H2 OS=Homo sapiens GN=ITIH2             | ITIH2    | 106.46 | 323.31 | 25 |
| P19827 | Inter-alpha-trypsin inhibitor heavy chain H1 OS=Homo sapiens GN=ITIH1             | ITIH1    | 101.39 | 323.31 | 17 |
| P19961 | Alpha-amylase 2B OS=Homo sapiens GN=AMY2B                                         | AMY2B    | 57.709 | 111.85 | 6  |
| P19971 | Thymidine phosphorylase OS=Homo sapiens GN=TYMP                                   | TYMP     | 49.955 | 7.2286 | 1  |
| P20023 | Complement receptor type 2 OS=Homo sapiens GN=CR2                                 | CR2      | 112.91 | 85.399 | 10 |
| P20742 | Pregnancy zone protein OS=Homo sapiens GN=PZP                                     | PZP      | 163.86 | 149.06 | 22 |
| P20774 | Mimecan OS=Homo sapiens GN=OGN                                                    | OGN      | 33.922 | 11.835 | 2  |
| P20810 | Calpastatin OS=Homo sapiens GN=CAST                                               | CAST     | 76.572 | 8.2661 | 1  |
| P20851 | C4b-binding protein beta chain OS=Homo sapiens GN=C4BPB                           | C4BPB    | 28.357 | 68.652 | 8  |
| P21291 | Cysteine and glycine-rich protein 1 OS=Homo sapiens GN=CSRP1                      | CSRP1    | 20.567 | 9.3979 | 1  |
| P21695 | Glycerol-3-phosphate dehydrogenase [NAD(+)], cytoplasmic OS=Homo sapiens GN=GPD1  | GPD1     | 37.567 | 7.1783 | 1  |
| P21796 | Voltage-dependent anion-selective channel protein 1 OS=Homo sapiens GN=VDAC1      | VDAC1    | 30.772 | 13.309 | 1  |
| P22105 | Tenascin-X OS=Homo sapiens GN=TNXB                                                | TNXB     | 458.22 | 323.31 | 32 |
| P22304 | Iduronate 2-sulfatase OS=Homo sapiens GN=IDS                                      | IDS      | 61.872 | 6.4037 | 1  |
| P22314 | Ubiquitin-like modifier-activating enzyme 1 OS=Homo sapiens GN=UBA1               | UBA1     | 117.85 | 34.417 | 4  |
| P22352 | Glutathione peroxidase 3 OS=Homo sapiens GN=GPX3                                  | GPX3     | 25.552 | 148.37 | 9  |
| P22392 | Nucleoside diphosphate kinase B OS=Homo sapiens GN=NME2                           | NME2     | 17.298 | 30.898 | 4  |
| P22692 | Insulin-like growth factor-binding protein 4 OS=Homo sapiens GN=IGFBP4            | IGFBP4   | 27.934 | 21.673 | 3  |
| P22792 | Carboxypeptidase N subunit 2 OS=Homo sapiens GN=CPN2                              | CPN2     | 60.556 | 239.2  | 9  |
| P22891 | Vitamin K-dependent protein Z OS=Homo sapiens GN=PROZ                             | PROZ     | 44.743 | 52.311 | 6  |



|        |                                                                                                  |          |        |        |    |
|--------|--------------------------------------------------------------------------------------------------|----------|--------|--------|----|
| P22897 | Macrophage mannose receptor 1 OS=Homo sapiens GN=MRC1                                            | MRC1     | 166.01 | 58.86  | 8  |
| P23142 | Fibulin-1 OS=Homo sapiens GN=FBLN1                                                               | FBLN1    | 77.213 | 205.47 | 11 |
| P23284 | Peptidyl-prolyl cis-trans isomerase B OS=Homo sapiens GN=PIIB                                    | PIIB     | 23.742 | 28.478 | 4  |
| P23381 | Tryptophan--tRNA ligase, cytoplasmic OS=Homo sapiens GN=WARS                                     | WARS     | 53.165 | 25.919 | 3  |
| P23467 | Receptor-type tyrosine-protein phosphatase beta OS=Homo sapiens GN=PTPRB                         | PTPRB    | 224.3  | 6.8328 | 1  |
| P23470 | Receptor-type tyrosine-protein phosphatase gamma OS=Homo sapiens GN=PTPRG                        | PTPRG    | 162    | 52.82  | 7  |
| P23471 | Receptor-type tyrosine-protein phosphatase zeta OS=Homo sapiens GN=PTPRZ1                        | PTPRZ1   | 254.58 | 35.56  | 5  |
| P23490 | Loricrin OS=Homo sapiens GN=LOR                                                                  | LOR      | 25.76  | 7.1    | 1  |
| P23526 | Adenosylhomocysteinase OS=Homo sapiens GN=AHCY                                                   | AHCY     | 47.716 | 20.362 | 3  |
| P23528 | Cofilin-1 OS=Homo sapiens GN=CFL1                                                                | CFL1     | 18.502 | 36.344 | 4  |
| P24043 | Laminin subunit alpha-2 OS=Homo sapiens GN=LAMA2                                                 | LAMA2    | 343.9  | 46.871 | 5  |
| P24298 | Alanine aminotransferase 1 OS=Homo sapiens GN=GPT                                                | GPT      | 54.636 | 6.3009 | 1  |
| P24387 | Corticotropin-releasing factor-binding protein OS=Homo sapiens GN=CRHBP                          | CRHBP    | 36.144 | 34.619 | 5  |
| P24592 | Insulin-like growth factor-binding protein 6 OS=Homo sapiens GN=IGFBP6                           | IGFBP6   | 25.322 | 81.45  | 4  |
| P24593 | Insulin-like growth factor-binding protein 5 OS=Homo sapiens GN=IGFBP5                           | IGFBP5   | 30.57  | 76.481 | 8  |
| P24666 | Low molecular weight phosphotyrosine protein phosphatase OS=Homo sapiens GN=ACPI                 | ACPI     | 18.042 | 31.555 | 2  |
| P24821 | Tenascin OS=Homo sapiens GN=TNC                                                                  | TNC      | 240.85 | 268.34 | 18 |
| P25311 | Zinc-alpha-2-glycoprotein OS=Homo sapiens GN=AZGP1                                               | AZGP1    | 34.258 | 323.31 | 17 |
| P25325 | 3-mercaptopyruvate sulfurtransferase OS=Homo sapiens GN=MPST                                     | MPST     | 33.178 | 6.2794 | 1  |
| P26038 | Moesin OS=Homo sapiens GN=MSN                                                                    | MSN      | 67.819 | 56.482 | 9  |
| P26447 | Protein S100-A4 OS=Homo sapiens GN=S100A4                                                        | S100A4   | 11.728 | 18.68  | 3  |
| P26927 | Hepatocyte growth factor-like protein OS=Homo sapiens GN=MST1                                    | MST1     | 80.319 | 323.31 | 15 |
| P26992 | Ciliary neurotrophic factor receptor subunit alpha OS=Homo sapiens GN=CNTFR                      | CNTFR    | 40.633 | 16.791 | 2  |
| P27169 | Serum paraoxonase/arylesterase 1 OS=Homo sapiens GN=PON1                                         | PON1     | 39.731 | 142.84 | 6  |
| P27487 | Dipeptidyl peptidase 4 OS=Homo sapiens GN=DPP4                                                   | DPP4     | 88.278 | 18.569 | 3  |
| P27797 | Calreticulin OS=Homo sapiens GN=CALR                                                             | CALR     | 48.141 | 56.55  | 6  |
| P27918 | Properdin OS=Homo sapiens GN=CFP                                                                 | CFP      | 51.276 | 182.29 | 15 |
| P27930 | Interleukin-1 receptor type 2 OS=Homo sapiens GN=IL1R2                                           | IL1R2    | 45.421 | 17.806 | 2  |
| P28799 | Granulins OS=Homo sapiens GN=GRN                                                                 | GRN      | 63.544 | 42.392 | 6  |
| P28827 | Receptor-type tyrosine-protein phosphatase mu OS=Homo sapiens GN=PTPRM                           | PTPRM    | 163.68 | 48.848 | 4  |
| P29401 | Transketolase OS=Homo sapiens GN=TKT                                                             | TKT      | 67.877 | 30.185 | 5  |
| P29622 | Kallistatin OS=Homo sapiens GN=SERPINA4                                                          | SERPINA4 | 48.541 | 253.31 | 14 |
| P30041 | Peroxiredoxin-6 OS=Homo sapiens GN=PRDX6                                                         | PRDX6    | 25.035 | 35.41  | 5  |
| P30043 | Flavin reductase (NADPH) OS=Homo sapiens GN=BLVRB                                                | BLVRB    | 22.119 | 95.352 | 6  |
| P30044 | Peroxiredoxin-5, mitochondrial OS=Homo sapiens GN=PRDX5                                          | PRDX5    | 22.086 | 11.852 | 2  |
| P30046 | D-dopachrome decarboxylase OS=Homo sapiens GN=DDT                                                | DDT      | 12.712 | 12.482 | 2  |
| P30086 | Phosphatidylethanolamine-binding protein 1 OS=Homo sapiens GN=PEBP1                              | PEBP1    | 21.057 | 22.363 | 3  |
| P30101 | Protein disulfide-isomerase A3 OS=Homo sapiens GN=PDIA3                                          | PDIA3    | 56.782 | 58.383 | 4  |
| P30530 | Tyrosine-protein kinase receptor UFO OS=Homo sapiens GN=AXL                                      | AXL      | 98.335 | 11.339 | 1  |
| P30566 | Adenylosuccinate lyase OS=Homo sapiens GN=ADSL                                                   | ADSL     | 54.889 | 12.721 | 2  |
| P31146 | Coronin-1A OS=Homo sapiens GN=CORO1A                                                             | CORO1A   | 51.026 | 36.657 | 2  |
| P31151 | Protein S100-A7 OS=Homo sapiens GN=S100A7                                                        | S100A7   | 11.471 | 13.836 | 2  |
| P31944 | Caspase-14 OS=Homo sapiens GN=CASP14                                                             | CASP14   | 27.679 | 49.399 | 4  |
| P31947 | 14-3-3 protein sigma OS=Homo sapiens GN=SFN                                                      | SFN      | 27.774 | 6.7972 | 2  |
| P31948 | Stress-induced-phosphoprotein 1 OS=Homo sapiens GN=STIP1                                         | STIP1    | 62.639 | 11.576 | 2  |
| P32004 | Neural cell adhesion molecule L1 OS=Homo sapiens GN=L1CAM                                        | L1CAM    | 140    | 57.621 | 4  |
| P32119 | Peroxiredoxin-2 OS=Homo sapiens GN=PRDX2                                                         | PRDX2    | 21.892 | 67.763 | 8  |
| P32754 | 4-hydroxyphenylpyruvate dioxygenase OS=Homo sapiens GN=HPD                                       | HPD      | 44.934 | 6.6935 | 1  |
| P32942 | Intercellular adhesion molecule 3 OS=Homo sapiens GN=ICAM3                                       | ICAM3    | 59.54  | 7.2661 | 1  |
| P33151 | Cadherin-5 OS=Homo sapiens GN=CDH5                                                               | CDH5     | 87.527 | 106.59 | 9  |
| P33908 | Mannosyl-oligosaccharide 1,2-alpha-mannosidase IA OS=Homo sapiens GN=MAN1A1                      | MAN1A1   | 72.968 | 56.493 | 8  |
| P34096 | Ribonuclease 4 OS=Homo sapiens GN=RNASE4                                                         | RNASE4   | 16.84  | 18.581 | 1  |
| P34932 | Heat shock 70 kDa protein 4 OS=Homo sapiens GN=HSPA4                                             | HSPA4    | 94.33  | 30.931 | 5  |
| P35443 | Thrombospondin-4 OS=Homo sapiens GN=THBS4                                                        | THBS4    | 105.87 | 323.31 | 14 |
| P35542 | Serum amyloid A-4 protein OS=Homo sapiens GN=SAA4                                                | SAA4     | 14.746 | 26.606 | 4  |
| P35555 | Fibrillin-1 OS=Homo sapiens GN=FBN1                                                              | FBN1     | 312.24 | 291.48 | 30 |
| P35579 | Myosin-9 OS=Homo sapiens GN=MYH9                                                                 | MYH9     | 226.53 | 13.297 | 2  |
| P35590 | Tyrosine-protein kinase receptor Tie-1 OS=Homo sapiens GN=TIE1                                   | TIE1     | 125.09 | 41.999 | 4  |
| P35754 | Glutaredoxin-1 OS=Homo sapiens GN=GLRX                                                           | GLRX     | 11.776 | 6.9009 | 1  |
| P35858 | Insulin-like growth factor-binding protein complex acid labile subunit OS=Homo sapiens GN=IGFALS | IGFALS   | 66.034 | 121.36 | 14 |
| P35916 | Vascular endothelial growth factor receptor 3 OS=Homo sapiens GN=FLT4                            | FLT4     | 152.76 | 83.302 | 6  |
| P36871 | Phosphoglucomutase-1 OS=Homo sapiens GN=PGM1                                                     | PGM1     | 61.448 | 23.964 | 4  |
| P36955 | Pigment epithelium-derived factor OS=Homo sapiens GN=SERPINF1                                    | SERPINF1 | 46.312 | 212.95 | 12 |
| P36980 | Complement factor H-related protein 2 OS=Homo sapiens GN=CFHR2                                   | CFHR2    | 30.65  | 129.63 | 10 |
| P37802 | Transgelin-2 OS=Homo sapiens GN=TAGLN2                                                           | TAGLN2   | 22.391 | 12.257 | 2  |
| P37837 | Transaldolase OS=Homo sapiens GN=TALDO1                                                          | TALDO1   | 37.54  | 28.981 | 3  |
| P37840 | Alpha-synuclein OS=Homo sapiens GN=SNCA                                                          | SNCA     | 14.46  | 63.26  | 3  |
| P39059 | Collagen alpha-1(XV) chain OS=Homo sapiens GN=COL15A1                                            | COL15A1  | 141.72 | 8.6699 | 1  |
| P39060 | Collagen alpha-1(XVIII) chain OS=Homo sapiens GN=COL18A1                                         | COL18A1  | 178.19 | 22.693 | 2  |
| P40189 | Interleukin-6 receptor subunit beta OS=Homo sapiens GN=IL6ST                                     | IL6ST    | 103.54 | 25.695 | 4  |
| P40197 | Platelet glycoprotein V OS=Homo sapiens GN=GP5                                                   | GP5      | 60.958 | 6.8016 | 1  |
| P40925 | Malate dehydrogenase, cytoplasmic OS=Homo sapiens GN=MDH1                                        | MDH1     | 36.426 | 91.997 | 8  |
| P40926 | Malate dehydrogenase, mitochondrial OS=Homo sapiens GN=MDH2                                      | MDH2     | 35.503 | 82.558 | 2  |
| P41222 | Prostaglandin-H2 D-isomerase OS=Homo sapiens GN=PTGDS                                            | PTGDS    | 21.029 | 11.603 | 2  |
| P42785 | Lysosomal Pro-X carboxypeptidase OS=Homo sapiens GN=PRCP                                         | PRCP     | 55.799 | 43.136 | 5  |
| P43121 | Cell surface glycoprotein MUC18 OS=Homo sapiens GN=MCAM                                          | MCAM     | 71.607 | 78.918 | 5  |
| P43251 | Biotinidase OS=Homo sapiens GN=BTD                                                               | BTD      | 61.132 | 99.55  | 6  |
| P43304 | Glycerol-3-phosphate dehydrogenase, mitochondrial OS=Homo sapiens GN=GPD2                        | GPD2     | 80.852 | 6.336  | 1  |
| P43652 | Afamin OS=Homo sapiens GN=AFM                                                                    | AFM      | 69.068 | 323.31 | 28 |
| P45880 | Voltage-dependent anion-selective channel protein 2 OS=Homo sapiens GN=VDAC2                     | VDAC2    | 31.566 | 125.79 | 1  |
| P46531 | Neurogenic locus notch homolog protein 1 OS=Homo sapiens GN=NOTCH1                               | NOTCH1   | 272.5  | 18.966 | 3  |
| P46926 | Glucosamine-6-phosphate isomerase 1 OS=Homo sapiens GN=GNPDA1                                    | GNPDA1   | 32.668 | 6.268  | 1  |
| P47756 | F-actin-capping protein subunit beta OS=Homo sapiens GN=CAPZB                                    | CAPZB    | 31.35  | 8.9129 | 1  |
| P48506 | Glutamate--cysteine ligase catalytic subunit OS=Homo sapiens GN=GCLC                             | GCLC     | 72.765 | 35.536 | 3  |
| P48637 | Glutathione synthetase OS=Homo sapiens GN=GSS                                                    | GSS      | 52.384 | 53.22  | 4  |
| P48740 | Mannan-binding lectin serine protease 1 OS=Homo sapiens GN=MASP1                                 | MASP1    | 79.246 | 242.91 | 14 |
| P48745 | Protein NOV homolog OS=Homo sapiens GN=NOV                                                       | NOV      | 39.162 | 13.06  | 2  |
| P49257 | Protein ERGIC-53 OS=Homo sapiens GN=LMAN1                                                        | LMAN1    | 57.548 | 8.0975 | 1  |
| P49368 | T-complex protein 1 subunit gamma OS=Homo sapiens GN=CCT3                                        | CCT3     | 60.533 | 6.4237 | 1  |

|        |                                                                                               |          |        |        |    |
|--------|-----------------------------------------------------------------------------------------------|----------|--------|--------|----|
| P49641 | Alpha-mannosidase 2x OS=Homo sapiens GN=MAN2A2                                                | MAN2A2   | 130.54 | 25.141 | 4  |
| P49747 | Cartilage oligomeric matrix protein OS=Homo sapiens GN=COMP                                   | COMP     | 82.86  | 323.31 | 14 |
| P49908 | Selenoprotein P OS=Homo sapiens GN=SEPP1                                                      | SEPP1    | 43.173 | 101.2  | 5  |
| P49913 | Cathelicidin antimicrobial peptide OS=Homo sapiens GN=CAMP                                    | CAMP     | 19.301 | 44.329 | 5  |
| P50395 | Rab GDP dissociation inhibitor beta OS=Homo sapiens GN=GDI2                                   | GDI2     | 50.663 | 55.706 | 6  |
| P50990 | T-complex protein 1 subunit theta OS=Homo sapiens GN=CCT8                                     | CCT8     | 59.62  | 12.341 | 1  |
| P50993 | Sodium/potassium-transporting ATPase subunit alpha-2 OS=Homo sapiens GN=ATP1A2                | ATP1A2   | 112.26 | 9.1007 | 2  |
| P51693 | Amyloid-like protein 1 OS=Homo sapiens GN=APLP1                                               | APLP1    | 72.176 | 8.2877 | 1  |
| P51884 | Lumican OS=Homo sapiens GN=LUM                                                                | LUM      | 38.429 | 148.63 | 9  |
| P52209 | 6-phosphogluconate dehydrogenase, decarboxylating OS=Homo sapiens GN=PGD                      | PGD      | 53.139 | 36.558 | 4  |
| P52907 | F-actin-capping protein subunit alpha-1 OS=Homo sapiens GN=CAPZA1                             | CAPZA1   | 32.922 | 8.4268 | 1  |
| P53396 | ATP-citrate synthase OS=Homo sapiens GN=ACLY                                                  | ACLY     | 120.84 | 11.397 | 2  |
| P54108 | Cysteine-rich secretory protein 3 OS=Homo sapiens GN=CRISP3                                   | CRISP3   | 27.63  | 40.637 | 4  |
| P54289 | Voltage-dependent calcium channel subunit alpha-2/delta-1 OS=Homo sapiens GN=CACNA2D1         | CACNA2D1 | 124.57 | 92.469 | 11 |
| P54578 | Ubiquitin carboxyl-terminal hydrolase 14 OS=Homo sapiens GN=USP14                             | USP14    | 56.068 | 13.754 | 2  |
| P54725 | UV excision repair protein RAD23 homolog A OS=Homo sapiens GN=RAD23A                          | RAD23A   | 39.609 | 6.7066 | 1  |
| P54764 | Ephrin type-A receptor 4 OS=Homo sapiens GN=EPHA4                                             | EPHA4    | 109.86 | 27.081 | 2  |
| P54802 | Alpha-N-acetylglucosaminidase OS=Homo sapiens GN=NAGLU                                        | NAGLU    | 82.265 | 79.279 | 4  |
| P55056 | Apolipoprotein C-IV OS=Homo sapiens GN=APOC4                                                  | APOC4    | 14.553 | 58.648 | 7  |
| P55058 | Phospholipid transfer protein OS=Homo sapiens GN=PLTP                                         | PLTP     | 54.739 | 51.916 | 4  |
| P55072 | Transitional endoplasmic reticulum ATPase OS=Homo sapiens GN=VCP                              | VCP      | 89.321 | 31.091 | 5  |
| P55103 | Inhibin beta C chain OS=Homo sapiens GN=INHBC                                                 | INHBC    | 38.237 | 69.549 | 4  |
| P55268 | Laminin subunit beta-2 OS=Homo sapiens GN=LAMB2                                               | LAMB2    | 195.98 | 6.6321 | 1  |
| P55285 | Cadherin-6 OS=Homo sapiens GN=CDH6                                                            | CDH6     | 88.308 | 22.427 | 3  |
| P55287 | Cadherin-11 OS=Homo sapiens GN=CDH11                                                          | CDH11    | 87.964 | 19.837 | 3  |
| P55290 | Cadherin-13 OS=Homo sapiens GN=CDH13                                                          | CDH13    | 78.286 | 121.45 | 11 |
| P55327 | Tumor protein D52 OS=Homo sapiens GN=TPD52                                                    | TPD52    | 24.327 | 22.939 | 1  |
| P56199 | Integrin alpha-1 OS=Homo sapiens GN=ITGA1                                                     | ITGA1    | 130.85 | 6.6687 | 1  |
| P58335 | Anthrax toxin receptor 2 OS=Homo sapiens GN=ANTXR2                                            | ANTXR2   | 53.666 | 39.848 | 4  |
| P58546 | Myotrophin OS=Homo sapiens GN=MTPN                                                            | MTPN     | 12.895 | 12.812 | 2  |
| P60174 | Triosephosphate isomerase OS=Homo sapiens GN=TPI1                                             | TPI1     | 30.791 | 83.382 | 6  |
| P60201 | Myelin proteolipid protein OS=Homo sapiens GN=PLP1                                            | PLP1     | 30.077 | 83.324 | 4  |
| P61020 | Ras-related protein Rab-5B OS=Homo sapiens GN=RAB5B                                           | RAB5B    | 23.707 | 9.5427 | 1  |
| P61106 | Ras-related protein Rab-14 OS=Homo sapiens GN=RAB14                                           | RAB14    | 23.897 | 7.8398 | 1  |
| P61626 | Lysozyme C OS=Homo sapiens GN=LYZ                                                             | LYZ      | 16.537 | 31.683 | 5  |
| P61764 | Syntaxin-binding protein 1 OS=Homo sapiens GN=STXBP1                                          | STXBP1   | 67.568 | 17.817 | 1  |
| P61769 | Beta-2-microglobulin OS=Homo sapiens GN=B2M                                                   | B2M      | 13.714 | 11.668 | 2  |
| P61916 | Epididymal secretory protein E1 OS=Homo sapiens GN=NPC2                                       | NPC2     | 16.57  | 37.008 | 3  |
| P61981 | 14-3-3 protein gamma OS=Homo sapiens GN=YWHAG                                                 | YWHAG    | 28.302 | 43.34  | 6  |
| P62158 | Calmodulin OS=Homo sapiens GN=CALM1                                                           | CALM1    | 16.837 | 72.245 | 5  |
| P62258 | 14-3-3 protein epsilon OS=Homo sapiens GN=YWHAE                                               | YWHAE    | 29.174 | 20.149 | 4  |
| P62760 | Visinin-like protein 1 OS=Homo sapiens GN=VSNL1                                               | VSNL1    | 22.142 | 6.2445 | 1  |
| P62826 | GTP-binding nuclear protein Ran OS=Homo sapiens GN=RAN                                        | RAN      | 24.423 | 13.215 | 1  |
| P62834 | Ras-related protein Rap-1A OS=Homo sapiens GN=RAP1A                                           | RAP1A    | 20.987 | 6.8036 | 1  |
| P62837 | Ubiquitin-conjugating enzyme E2 D2 OS=Homo sapiens GN=UBE2D2                                  | UBE2D2   | 16.735 | 6.3107 | 1  |
| P62873 | Guanine nucleotide-binding protein G(I)/G(S)/G(T) subunit beta-1 OS=Homo sapiens GN=GNB1      | GNB1     | 37.377 | 6.7491 | 1  |
| P62917 | 60S ribosomal protein L8 OS=Homo sapiens GN=RPL8                                              | RPL8     | 28.024 | 7.1562 | 1  |
| P62937 | Peptidyl-prolyl cis-trans isomerase A OS=Homo sapiens GN=PPIA                                 | PPIA     | 18.012 | 37.156 | 6  |
| P62942 | Peptidyl-prolyl cis-trans isomerase FKBP1A OS=Homo sapiens GN=FKBP1A                          | FKBP1A   | 11.951 | 21.319 | 1  |
| P62987 | Ubiquitin-60S ribosomal protein L40 OS=Homo sapiens GN=UBA52                                  | UBA52    | 14.728 | 27.644 | 3  |
| P63104 | 14-3-3 protein zeta/delta OS=Homo sapiens GN=YWHAZ                                            | YWHAZ    | 27.745 | 46.877 | 5  |
| P63208 | S-phase kinase-associated protein 1 OS=Homo sapiens GN=SKP1                                   | SKP1     | 18.658 | 18.981 | 3  |
| P63261 | Actin, cytoplasmic 2 OS=Homo sapiens GN=ACTG1                                                 | ACTG1    | 41.792 | 192.24 | 11 |
| P68366 | Tubulin alpha-4A chain OS=Homo sapiens GN=TUBA4A                                              | TUBA4A   | 49.924 | 32.751 | 3  |
| P68871 | Hemoglobin subunit beta OS=Homo sapiens GN=HBB                                                | HBB      | 15.998 | 311.84 | 10 |
| P69892 | Hemoglobin subunit gamma-2 OS=Homo sapiens GN=HBG2                                            | HBG2     | 16.126 | 114.87 | 8  |
| P78324 | Tyrosine-protein phosphatase non-receptor type substrate 1 OS=Homo sapiens GN=SIRPA           | SIRPA    | 54.966 | 14.729 | 2  |
| P78417 | Glutathione S-transferase omega-1 OS=Homo sapiens GN=GSTO1                                    | GSTO1    | 27.566 | 38.247 | 6  |
| P78509 | Reelin OS=Homo sapiens GN=RELN                                                                | RELN     | 388.38 | 24.444 | 4  |
| P80108 | Phosphatidylinositol-glycan-specific phospholipase D OS=Homo sapiens GN=GPLD1                 | GPLD1    | 92.335 | 223.29 | 15 |
| P80188 | Neutrophil gelatinase-associated lipocalin OS=Homo sapiens GN=LCN2                            | LCN2     | 22.588 | 19.364 | 3  |
| P80723 | Brain acid soluble protein 1 OS=Homo sapiens GN=BASP1                                         | BASP1    | 22.693 | 91.349 | 6  |
| P81605 | Dermcidin OS=Homo sapiens GN=DCD                                                              | DCD      | 11.284 | 49.202 | 4  |
| P84085 | ADP-ribosylation factor 5 OS=Homo sapiens GN=ARF5                                             | ARF5     | 20.529 | 7.2427 | 1  |
| P98160 | Basement membrane-specific heparan sulfate proteoglycan core protein OS=Homo sapiens GN=HSPG2 | HSPG2    | 468.83 | 234.75 | 26 |
| P98198 | Phospholipid-transporting ATPase ID OS=Homo sapiens GN=ATP8B2                                 | ATP8B2   | 137.44 | -2     | 1  |
| Q00610 | Clathrin heavy chain 1 OS=Homo sapiens GN=CLTC                                                | CLTC     | 191.61 | 11.899 | 2  |
| Q01459 | Di-N-acetylchitobiase OS=Homo sapiens GN=CTBS                                                 | CTBS     | 43.759 | 29.268 | 3  |
| Q01469 | Fatty acid-binding protein, epidermal OS=Homo sapiens GN=FABP5                                | FABP5    | 15.164 | 12.062 | 2  |
| Q01518 | Adenylyl cyclase-associated protein 1 OS=Homo sapiens GN=CAP1                                 | CAP1     | 51.901 | 6.6176 | 1  |
| Q01973 | Inactive tyrosine-protein kinase transmembrane receptor ROR1 OS=Homo sapiens GN=ROR1          | ROR1     | 104.28 | 6.555  | 1  |
| Q02413 | Desmoglein-1 OS=Homo sapiens GN=DSG1                                                          | DSG1     | 113.75 | 133.05 | 8  |
| Q02487 | Desmocollin-2 OS=Homo sapiens GN=DSC2                                                         | DSC2     | 99.961 | 8.6043 | 1  |
| Q02818 | Nucleobindin-1 OS=Homo sapiens GN=NUCB1                                                       | NUCB1    | 53.879 | 8.3137 | 1  |
| Q02978 | Mitochondrial 2-oxoglutarate/malate carrier protein OS=Homo sapiens GN=SLC25A11               | SLC25A11 | 34.061 | 17.805 | 1  |
| Q02985 | Complement factor H-related protein 3 OS=Homo sapiens GN=CFHR3                                | CFHR3    | 37.323 | 99.823 | 5  |
| Q03154 | Aminoacylase-1 OS=Homo sapiens GN=ACY1                                                        | ACY1     | 45.884 | 14.027 | 2  |
| Q03167 | Transforming growth factor beta receptor type 3 OS=Homo sapiens GN=TGFBR3                     | TGFBR3   | 93.498 | 22.248 | 3  |
| Q03591 | Complement factor H-related protein 1 OS=Homo sapiens GN=CFHR1                                | CFHR1    | 37.65  | 6.5619 | 10 |
| Q04721 | Neurogenic locus notch homolog protein 2 OS=Homo sapiens GN=NOTCH2                            | NOTCH2   | 265.4  | 34.294 | 3  |
| Q04756 | Hepatocyte growth factor activator OS=Homo sapiens GN=HGFAC                                   | HGFAC    | 70.681 | 210.03 | 12 |
| Q05707 | Collagen alpha-1(XIV) chain OS=Homo sapiens GN=COL14A1                                        | COL14A1  | 193.51 | 9.1007 | 1  |
| Q05C16 | Leucine-rich repeat-containing protein 63 OS=Homo sapiens GN=LRRC63                           | LRRC63   | 66.308 | 7.0031 | 1  |
| Q06033 | Inter-alpha-trypsin inhibitor heavy chain H3 OS=Homo sapiens GN=ITI3                          | ITI3     | 99.848 | 277.19 | 19 |
| Q06323 | Proteasome activator complex subunit 1 OS=Homo sapiens GN=PSME1                               | PSME1    | 28.723 | 6.4687 | 1  |
| Q06828 | Fibromodulin OS=Homo sapiens GN=FMOD                                                          | FMOD     | 43.178 | 11.906 | 1  |
| Q06830 | Peroxiredoxin-1 OS=Homo sapiens GN=PRDX1                                                      | PRDX1    | 22.11  | 32.657 | 6  |
| Q07075 | Glutamyl aminopeptidase OS=Homo sapiens GN=ENPEP                                              | ENPEP    | 109.24 | 12.626 | 2  |
| Q07507 | Dermatopontin OS=Homo sapiens GN=DPT                                                          | DPT      | 24.005 | 11.244 | 1  |

|        |                                                                                                             |          |        |        |    |
|--------|-------------------------------------------------------------------------------------------------------------|----------|--------|--------|----|
| Q07954 | Prolow-density lipoprotein receptor-related protein 1 OS=Homo sapiens GN=LRP1                               | LRP1     | 504.6  | 323.31 | 35 |
| Q08188 | Protein-glutamine gamma-glutamyltransferase E OS=Homo sapiens GN=TGM3                                       | TGM3     | 76.631 | 7.1411 | 1  |
| Q08257 | Quinone oxidoreductase OS=Homo sapiens GN=CRYZ                                                              | CRYZ     | 35.206 | 7.0872 | 1  |
| Q08380 | Galectin-3-binding protein OS=Homo sapiens GN=LGALS3BP                                                      | LGALS3BP | 65.33  | 303.68 | 14 |
| Q08554 | Desmocollin-1 OS=Homo sapiens GN=DSC1                                                                       | DSC1     | 99.986 | 47.376 | 5  |
| Q08830 | Fibrinogen-like protein 1 OS=Homo sapiens GN=FGL1                                                           | FGL1     | 36.379 | 108.73 | 7  |
| Q10469 | Alpha-1,6-mannosyl-glycoprotein 2-beta-N-acetylglucosaminyltransferase OS=Homo sapiens GN=MGAT2             | MGAT2    | 51.55  | 6.3208 | 1  |
| Q10471 | Polypeptide N-acetylgalactosaminyltransferase 2 OS=Homo sapiens GN=GALNT2                                   | GALNT2   | 64.732 | 12.228 | 2  |
| Q10588 | ADP-ribosyl cyclase/cyclic ADP-ribose hydrolase 2 OS=Homo sapiens GN=BST1                                   | BST1     | 35.724 | 12.461 | 2  |
| Q12805 | EGF-containing fibulin-like extracellular matrix protein 1 OS=Homo sapiens GN=EFEMP1                        | EFEMP1   | 54.64  | 129.77 | 10 |
| Q12841 | Follistatin-related protein 1 OS=Homo sapiens GN=FSTL1                                                      | FSTL1    | 34.985 | 29.573 | 5  |
| Q12860 | Contactin-1 OS=Homo sapiens GN=CNTN1                                                                        | CNTN1    | 113.32 | 120.66 | 15 |
| Q12864 | Cadherin-17 OS=Homo sapiens GN=CDH17                                                                        | CDH17    | 92.218 | 7.1263 | 1  |
| Q12866 | Tyrosine-protein kinase Mer OS=Homo sapiens GN=MERTK                                                        | MERTK    | 110.25 | 6.7747 | 1  |
| Q12884 | Prolyl endopeptidase FAP OS=Homo sapiens GN=FAP                                                             | FAP      | 87.711 | 52.134 | 7  |
| Q12907 | Vesicular integral-membrane protein VIP36 OS=Homo sapiens GN=LMAN2                                          | LMAN2    | 40.228 | 22.233 | 3  |
| Q12913 | Receptor-type tyrosine-protein phosphatase eta OS=Homo sapiens GN=PTPRJ                                     | PTPRJ    | 145.94 | 87.457 | 4  |
| Q13093 | Platelet-activating factor acetylhydrolase OS=Homo sapiens GN=PLA2G7                                        | PLA2G7   | 50.077 | 19.524 | 3  |
| Q13103 | Secreted phosphoprotein 24 OS=Homo sapiens GN=SPP2                                                          | SPP2     | 24.337 | 49.993 | 5  |
| Q13201 | Multimerin-1 OS=Homo sapiens GN=MMRN1                                                                       | MMRN1    | 138.11 | 93.774 | 11 |
| Q13228 | Selenium-binding protein 1 OS=Homo sapiens GN=SELENBP1                                                      | SELENBP1 | 52.39  | 59.803 | 7  |
| Q13332 | Receptor-type tyrosine-protein phosphatase S OS=Homo sapiens GN=PTPRS                                       | PTPRS    | 217.04 | 81.315 | 7  |
| Q13361 | Microfibrillar-associated protein 5 OS=Homo sapiens GN=MFAP5                                                | MFAP5    | 19.611 | 6.5426 | 1  |
| Q13404 | Ubiquitin-conjugating enzyme E2 variant 1 OS=Homo sapiens GN=UBE2V1                                         | UBE2V1   | 16.495 | 19.503 | 2  |
| Q13421 | Mesothelin OS=Homo sapiens GN=MSLN                                                                          | MSLN     | 68.985 | 29.057 | 3  |
| Q13449 | Limbic system-associated membrane protein OS=Homo sapiens GN=LSAMP                                          | LSAMP    | 37.393 | 21.826 | 3  |
| Q13508 | Ecto-ADP-ribosyltransferase 3 OS=Homo sapiens GN=ART3                                                       | ART3     | 43.923 | 81.905 | 2  |
| Q13509 | Tubulin beta-3 chain OS=Homo sapiens GN=TUBB3                                                               | TUBB3    | 50.432 | 12.796 | 1  |
| Q13740 | CD166 antigen OS=Homo sapiens GN=ALCAM                                                                      | ALCAM    | 65.102 | 74.838 | 6  |
| Q13790 | Apolipoprotein F OS=Homo sapiens GN=APOF                                                                    | APOF     | 35.399 | 49.854 | 3  |
| Q13822 | Ectonucleotide pyrophosphatase/phosphodiesterase family member 2 OS=Homo sapiens GN=ENPP2                   | ENPP2    | 98.993 | 59.171 | 8  |
| Q13867 | Bleomycin hydrolase OS=Homo sapiens GN=BLMH                                                                 | BLMH     | 52.562 | 17.033 | 2  |
| Q14118 | Dystroglycan OS=Homo sapiens GN=DAG1                                                                        | DAG1     | 97.44  | 44.447 | 4  |
| Q14126 | Desmoglein-2 OS=Homo sapiens GN=DSG2                                                                        | DSG2     | 122.29 | 22.773 | 3  |
| Q14314 | Fibroleukin OS=Homo sapiens GN=FGL2                                                                         | FGL2     | 50.228 | 11.778 | 2  |
| Q14393 | Growth arrest-specific protein 6 OS=Homo sapiens GN=GAS6                                                    | GAS6     | 79.676 | 17.482 | 2  |
| Q14515 | SPARC-like protein 1 OS=Homo sapiens GN=SPARCL1                                                             | SPARCL1  | 75.207 | 107.37 | 9  |
| Q14517 | Protocadherin Fat 1 OS=Homo sapiens GN=FAT1                                                                 | FAT1     | 506.27 | 6.2987 | 1  |
| Q14520 | Hyaluronan-binding protein 2 OS=Homo sapiens GN=HABP2                                                       | HABP2    | 62.671 | 293.77 | 15 |
| Q14574 | Desmocollin-3 OS=Homo sapiens GN=DSC3                                                                       | DSC3     | 99.968 | 18.785 | 3  |
| Q14624 | Inter-alpha-trypsin inhibitor heavy chain H4 OS=Homo sapiens GN=ITIH4                                       | ITIH4    | 103.36 | 323.31 | 25 |
| Q14766 | Latent-transforming growth factor beta-binding protein 1 OS=Homo sapiens GN=LTBP1                           | LTBP1    | 186.79 | 89.057 | 8  |
| Q14956 | Transmembrane glycoprotein NMB OS=Homo sapiens GN=GPNMB                                                     | GPNMB    | 63.922 | 22.317 | 3  |
| Q15063 | Periostin OS=Homo sapiens GN=POSTN                                                                          | POSTN    | 93.313 | 180.95 | 16 |
| Q15113 | Procollagen C-endopeptidase enhancer 1 OS=Homo sapiens GN=PCOLCE                                            | PCOLCE   | 47.972 | 175.14 | 11 |
| Q15155 | Nodal modulator 1 OS=Homo sapiens GN=NOMO1                                                                  | NOMO1    | 134.32 | 34.942 | 4  |
| Q15166 | Serum paraoxonase/lactonase 3 OS=Homo sapiens GN=PON3                                                       | PON3     | 39.607 | 38.858 | 5  |
| Q15223 | Nectin-1 OS=Homo sapiens GN=NECTIN1                                                                         | NECTIN1  | 57.157 | 20.251 | 3  |
| Q15485 | Ficolin-2 OS=Homo sapiens GN=FCN2                                                                           | FCN2     | 34.001 | 7.6558 | 1  |
| Q15582 | Transforming growth factor-beta-induced protein ig-h3 OS=Homo sapiens GN=TGFBI                              | TGFBI    | 74.68  | 176.59 | 15 |
| Q15828 | Cystatin-M OS=Homo sapiens GN=CST6                                                                          | CST6     | 16.511 | 8.0577 | 1  |
| Q15848 | Adiponectin OS=Homo sapiens GN=ADIPOQ                                                                       | ADIPOQ   | 26.413 | 7.0184 | 1  |
| Q16270 | Insulin-like growth factor-binding protein 7 OS=Homo sapiens GN=IGFBP7                                      | IGFBP7   | 29.13  | 65.78  | 5  |
| Q16610 | Extracellular matrix protein 1 OS=Homo sapiens GN=ECM1                                                      | ECM1     | 60.673 | 323.31 | 19 |
| Q16620 | BDNF/NT-3 growth factors receptor OS=Homo sapiens GN=NTRK2                                                  | NTRK2    | 91.998 | 8.9915 | 1  |
| Q16627 | C-C motif chemokine 14 OS=Homo sapiens GN=CCL14                                                             | CCL14    | 10.678 | 11.913 | 2  |
| Q16706 | Alpha-mannosidase 2 OS=Homo sapiens GN=MAN2A1                                                               | MAN2A1   | 131.14 | 220.16 | 9  |
| Q16775 | Hydroxyacylglutathione hydrolase, mitochondrial OS=Homo sapiens GN=HAGH                                     | HAGH     | 33.805 | 7.9216 | 1  |
| Q16851 | UTP--glucose-1-phosphate uridylyltransferase OS=Homo sapiens GN=UGP2                                        | UGP2     | 56.94  | 17.399 | 3  |
| Q16853 | Membrane primary amine oxidase OS=Homo sapiens GN=AOC3                                                      | AOC3     | 84.621 | 63.459 | 6  |
| Q16881 | Thioredoxin reductase 1, cytoplasmic OS=Homo sapiens GN=TXNRD1                                              | TXNRD1   | 70.905 | -2     | 1  |
| Q17RW2 | Collagen alpha-1(XXIV) chain OS=Homo sapiens GN=COL24A1                                                     | COL24A1  | 175.49 | 6.25   | 1  |
| Q24JP5 | Transmembrane protein 132A OS=Homo sapiens GN=TMEM132A                                                      | TMEM132A | 110.11 | 6.9807 | 1  |
| Q4G0P3 | Hydrocephalus-inducing protein homolog OS=Homo sapiens GN=HYDIN                                             | HYDIN    | 575.89 | 11.339 | 2  |
| Q4LDE5 | Sushi, von Willebrand factor type A, EGF and pentraxin domain-containing protein 1 OS=Homo sapiens GN=SVEP1 | SVEP1    | 390.17 | 24.509 | 4  |
| Q537H7 | Spermatogenesis-associated protein 45 OS=Homo sapiens GN=SPATA45                                            | SPATA45  | 11.356 | -2     | 1  |
| Q5T749 | Keratinocyte proline-rich protein OS=Homo sapiens GN=KPRP                                                   | KPRP     | 64.135 | 80.878 | 7  |
| Q5VTE0 | Putative elongation factor 1-alpha-like 3 OS=Homo sapiens GN=EEF1A1P5                                       | EEF1A1P5 | 50.184 | 12.968 | 2  |
| Q5VVQ6 | Ubiquitin thioesterase OTU1 OS=Homo sapiens GN=YOD1                                                         | YOD1     | 38.322 | 6.2686 | 1  |
| Q6EMK4 | Vasorin OS=Homo sapiens GN=VASN                                                                             | VASN     | 71.712 | 40.956 | 4  |
| Q6NTF9 | Rhomboid domain-containing protein 2 OS=Homo sapiens GN=RHBDD2                                              | RHBDD2   | 39.202 | -2     | 1  |
| Q6NXT2 | Histone H3.3C OS=Homo sapiens GN=H3F3C                                                                      | H3F3C    | 15.214 | 6.7933 | 1  |
| Q6P179 | Endoplasmic reticulum aminopeptidase 2 OS=Homo sapiens GN=ERAP2                                             | ERAP2    | 110.46 | 49.562 | 6  |
| Q6P387 | Uncharacterized protein C16orf46 OS=Homo sapiens GN=C16orf46                                                | C16orf46 | 43.417 | 6.1822 | 1  |
| Q6Q788 | Apolipoprotein A-V OS=Homo sapiens GN=APOA5                                                                 | APOA5    | 41.212 | 11.132 | 2  |
| Q6UVK1 | Chondroitin sulfate proteoglycan 4 OS=Homo sapiens GN=CSPG4                                                 | CSPG4    | 250.53 | 24.228 | 4  |
| Q6UWP8 | Suprabasin OS=Homo sapiens GN=SBSN                                                                          | SBSN     | 60.54  | 161.13 | 6  |
| Q6UX71 | Plexin domain-containing protein 2 OS=Homo sapiens GN=PLXDC2                                                | PLXDC2   | 59.582 | 38.069 | 5  |
| Q6UXB8 | Peptidase inhibitor 16 OS=Homo sapiens GN=PI16                                                              | PI16     | 49.471 | 37.954 | 5  |
| Q6UY14 | ADAMTS-like protein 4 OS=Homo sapiens GN=ADAMTSL4                                                           | ADAMTSL4 | 116.54 | 48.004 | 4  |
| Q6XQN6 | Nicotinate phosphoribosyltransferase OS=Homo sapiens GN=NAPRT                                               | NAPRT    | 57.578 | 13.863 | 2  |
| Q6YHK3 | CD109 antigen OS=Homo sapiens GN=CD109                                                                      | CD109    | 161.69 | 60.757 | 8  |
| Q6ZSC3 | RNA-binding protein 43 OS=Homo sapiens GN=RBM43                                                             | RBM43    | 40.666 | 11.183 | 2  |
| Q76LX8 | A disintegrin and metalloproteinase with thrombospondin motifs 13 OS=Homo sapiens GN=ADAMTS13               | ADAMTS13 | 153.6  | 154.38 | 14 |
| Q7L1Q6 | Basic leucine zipper and W2 domain-containing protein 1 OS=Homo sapiens GN=BZW1                             | BZW1     | 48.043 | 6.2147 | 1  |
| Q7Z5N4 | Protein sidekick-1 OS=Homo sapiens GN=SDK1                                                                  | SDK1     | 242.11 | 12.605 | 2  |
| Q7Z7G0 | Target of Nesh-SH3 OS=Homo sapiens GN=ABI3BP                                                                | ABI3BP   | 118.64 | 145.31 | 5  |
| Q7Z7M0 | Multiple epidermal growth factor-like domains protein 8 OS=Homo sapiens GN=MEGF8                            | MEGF8    | 303.1  | 86.143 | 10 |
| Q86TH1 | ADAMTS-like protein 2 OS=Homo sapiens GN=ADAMTSL2                                                           | ADAMTSL2 | 104.62 | 49.124 | 5  |

|        |                                                                                       |           |        |        |    |
|--------|---------------------------------------------------------------------------------------|-----------|--------|--------|----|
| Q86TY3 | Uncharacterized protein C14orf37 OS=Homo sapiens GN=C14orf37                          | C14orf37  | 84.172 | 7.9969 | 1  |
| Q86U17 | Serpin A11 OS=Homo sapiens GN=SERPINA11                                               | SERPINA11 | 46.989 | 45.966 | 6  |
| Q86UD1 | Out at first protein homolog OS=Homo sapiens GN=OAF                                   | OAF       | 30.688 | 14.748 | 2  |
| Q86UN3 | Reticulon-4 receptor-like 2 OS=Homo sapiens GN=RTN4RL2                                | RTN4RL2   | 46.105 | 18.605 | 1  |
| Q86VB7 | Scavenger receptor cysteine-rich type 1 protein M130 OS=Homo sapiens GN=CD163         | CD163     | 125.45 | 219.92 | 15 |
| Q86VP6 | Cullin-associated NEDD8-dissociated protein 1 OS=Homo sapiens GN=CAND1                | CAND1     | 136.37 | 19.356 | 3  |
| Q86X29 | Lipolysis-stimulated lipoprotein receptor OS=Homo sapiens GN=LSR                      | LSR       | 71.438 | 6.2378 | 1  |
| Q86X40 | Leucine-rich repeat-containing protein 28 OS=Homo sapiens GN=LRRC28                   | LRRC28    | 41.912 | -2     | 1  |
| Q8IUL8 | Cartilage intermediate layer protein 2 OS=Homo sapiens GN=CILP2                       | CILP2     | 126.29 | 88.185 | 7  |
| Q8IWV2 | Contactin-4 OS=Homo sapiens GN=CNTN4                                                  | CNTN4     | 113.45 | 17.927 | 3  |
| Q8IXL6 | Extracellular serine/threonine protein kinase FAM20C OS=Homo sapiens GN=FAM20C        | FAM20C    | 66.234 | 34.64  | 3  |
| Q8IZF2 | Adhesion G protein-coupled receptor F5 OS=Homo sapiens GN=ADGRF5                      | ADGRF5    | 149.46 | 82.59  | 8  |
| Q8IZF6 | Adhesion G-protein coupled receptor G4 OS=Homo sapiens GN=ADGRG4                      | ADGRG4    | 333.36 | 6.2505 | 1  |
| Q8N9N2 | Activating signal cointegrator 1 complex subunit 1 OS=Homo sapiens GN=ASCC1           | ASCC1     | 45.509 | -2     | 1  |
| Q8NBJ4 | Golgi membrane protein 1 OS=Homo sapiens GN=GOLM1                                     | GOLM1     | 45.333 | 33.555 | 4  |
| Q8NBP7 | Proprotein convertase subtilisin/kexin type 9 OS=Homo sapiens GN=PCSK9                | PCSK9     | 74.285 | 134.03 | 9  |
| Q8NCC3 | Group XV phospholipase A2 OS=Homo sapiens GN=PLA2G15                                  | PLA2G15   | 46.657 | 10.054 | 1  |
| Q8NDA2 | Hemicentin-2 OS=Homo sapiens GN=HMCN2                                                 | HMCN2     | 541.97 | 20.048 | 3  |
| Q8NE65 | Protein ZNF738 OS=Homo sapiens GN=ZNF738                                              | ZNF738    | 15.884 | 6.4254 | 1  |
| Q8NFI4 | Putative protein FAM10A5 OS=Homo sapiens GN=ST13P5                                    | ST13P5    | 41.377 | 23.331 | 3  |
| Q8TDL5 | BPI fold-containing family B member 1 OS=Homo sapiens GN=BPIFB1                       | BPIFB1    | 52.441 | 12.249 | 2  |
| Q8TDY8 | Immunoglobulin superfamily DCC subclass member 4 OS=Homo sapiens GN=IGDCC4            | IGDCC4    | 134.21 | 7.5381 | 1  |
| Q8TER0 | Sushi, nidogen and EGF-like domain-containing protein 1 OS=Homo sapiens GN=SNED1      | SNED1     | 152.2  | 19.778 | 2  |
| Q8WUA8 | Tsukushin OS=Homo sapiens GN=TSKU                                                     | TSKU      | 37.807 | 9.1884 | 1  |
| Q8WUM4 | Programmed cell death 6-interacting protein OS=Homo sapiens GN=PDCD6IP                | PDCD6IP   | 96.022 | 12.601 | 2  |
| Q8WWA0 | Intelectin-1 OS=Homo sapiens GN=ITLN1                                                 | ITLN1     | 34.961 | 6.3594 | 1  |
| Q8WWZ8 | Oncoprotein-induced transcript 3 protein OS=Homo sapiens GN=OIT3                      | OIT3      | 60.021 | 40.421 | 5  |
| Q8WZ75 | Roundabout homolog 4 OS=Homo sapiens GN=ROBO4                                         | ROBO4     | 107.46 | 38.46  | 1  |
| Q92484 | Acid sphingomyelinase-like phosphodiesterase 3a OS=Homo sapiens GN=SMPDL3A            | SMPDL3A   | 51.26  | 19.36  | 3  |
| Q92496 | Complement factor H-related protein 4 OS=Homo sapiens GN=CFHR4                        | CFHR4     | 65.35  | 48.902 | 4  |
| Q92520 | Protein FAM3C OS=Homo sapiens GN=FAM3C                                                | FAM3C     | 24.68  | 24.078 | 3  |
| Q92752 | Tenascin-R OS=Homo sapiens GN=TNR                                                     | TNR       | 149.56 | -2     | 1  |
| Q92823 | Neuronal cell adhesion molecule OS=Homo sapiens GN=NRCAM                              | NRCAM     | 143.89 | 29.896 | 4  |
| Q92859 | Neogenin OS=Homo sapiens GN=NEO1                                                      | NEO1      | 160.01 | 46.651 | 6  |
| Q92954 | Proteoglycan 4 OS=Homo sapiens GN=PRG4                                                | PRG4      | 151.08 | 121.69 | 17 |
| Q93063 | Exostosin-2 OS=Homo sapiens GN=EXT2                                                   | EXT2      | 82.254 | 27.354 | 4  |
| Q969T9 | WW domain-binding protein 2 OS=Homo sapiens GN=WBP2                                   | WBP2      | 28.087 | 40.824 | 1  |
| Q96BZ4 | Phospholipase D4 OS=Homo sapiens GN=PLD4                                              | PLD4      | 55.626 | 6.5669 | 1  |
| Q96EE4 | Coiled-coil domain-containing protein 126 OS=Homo sapiens GN=CCDC126                  | CCDC126   | 15.668 | 11.702 | 2  |
| Q96IY4 | Carboxypeptidase B2 OS=Homo sapiens GN=CPB2                                           | CPB2      | 48.424 | 42.8   | 5  |
| Q96KG7 | Multiple epidermal growth factor-like domains protein 10 OS=Homo sapiens GN=MEGF10    | MEGF10    | 122.2  | 27.972 | 3  |
| Q96KN2 | Beta-Ala-His dipeptidase OS=Homo sapiens GN=CNDP1                                     | CNDP1     | 56.705 | 250.35 | 10 |
| Q96NZ9 | Proline-rich acidic protein 1 OS=Homo sapiens GN=PRAP1                                | PRAP1     | 17.207 | 6.5876 | 1  |
| Q96PD5 | N-acetylmuramoyl-L-alanine amidase OS=Homo sapiens GN=PGLYRP2                         | PGLYRP2   | 62.216 | 323.31 | 8  |
| Q96S96 | Phosphatidylethanolamine-binding protein 4 OS=Homo sapiens GN=PEBP4                   | PEBP4     | 25.733 | 22.508 | 3  |
| Q99435 | Protein kinase C-binding protein NELL2 OS=Homo sapiens GN=NELL2                       | NELL2     | 91.346 | 13.529 | 2  |
| Q99497 | Protein deglycase DJ-1 OS=Homo sapiens GN=PARK7                                       | PARK7     | 19.891 | 25.818 | 4  |
| Q99650 | Oncostatin-M-specific receptor subunit beta OS=Homo sapiens GN=OSMR                   | OSMR      | 110.51 | 17.914 | 2  |
| Q99715 | Collagen alpha-1(XII) chain OS=Homo sapiens GN=COL12A1                                | COL12A1   | 333.14 | 60.782 | 9  |
| Q99784 | Noelin OS=Homo sapiens GN=OLFM1                                                       | OLFM1     | 55.342 | 73.618 | 6  |
| Q99878 | Histone H2A type 1-J OS=Homo sapiens GN=HIST1H2AJ                                     | HIST1H2AJ | 13.936 | 11.836 | 2  |
| Q99880 | Histone H2B type 1-L OS=Homo sapiens GN=HIST1H2BL                                     | HIST1H2BL | 13.952 | 7.7241 | 1  |
| Q99969 | Retinoic acid receptor responder protein 2 OS=Homo sapiens GN=RARRES2                 | RARRES2   | 18.617 | 11.647 | 1  |
| Q99972 | Myocilin OS=Homo sapiens GN=MYOC                                                      | MYOC      | 56.971 | 26.145 | 4  |
| Q99983 | Osteomodulin OS=Homo sapiens GN=OMD                                                   | OMD       | 49.492 | 33.408 | 3  |
| Q9BQ51 | Programmed cell death 1 ligand 2 OS=Homo sapiens GN=PDCD1LG2                          | PDCD1LG2  | 30.957 | 6.4107 | 1  |
| Q9BRA2 | Thioredoxin domain-containing protein 17 OS=Homo sapiens GN=TXNDC17                   | TXNDC17   | 13.941 | 7.0059 | 1  |
| Q9BS26 | Endoplasmic reticulum resident protein 44 OS=Homo sapiens GN=ERP44                    | ERP44     | 46.971 | 6.2146 | 1  |
| Q9BTY2 | Plasma alpha-L-fucosidase OS=Homo sapiens GN=FUCA2                                    | FUCA2     | 54.066 | 37.411 | 6  |
| Q9BUN1 | Protein MENT OS=Homo sapiens GN=MENT                                                  | MENT      | 36.769 | 8.9064 | 1  |
| Q9BWP8 | Collectin-11 OS=Homo sapiens GN=COLEC11                                               | COLEC11   | 28.665 | 82.279 | 4  |
| Q9BXJ4 | Complement C1q tumor necrosis factor-related protein 3 OS=Homo sapiens GN=C1QTNF3     | C1QTNF3   | 26.994 | 10.011 | 1  |
| Q9BXR6 | Complement factor H-related protein 5 OS=Homo sapiens GN=CFHR5                        | CFHR5     | 64.419 | 148.84 | 12 |
| Q9BY67 | Cell adhesion molecule 1 OS=Homo sapiens GN=CADM1                                     | CADM1     | 48.509 | 148.4  | 4  |
| Q9BYE9 | Cadherin-related family member 2 OS=Homo sapiens GN=CDHR2                             | CDHR2     | 141.54 | 14.326 | 2  |
| Q9BYJ0 | Fibroblast growth factor-binding protein 2 OS=Homo sapiens GN=FGFBP2                  | FGFBP2    | 24.581 | 27.347 | 4  |
| Q9BYZ6 | Rho-related BTB domain-containing protein 2 OS=Homo sapiens GN=RHOBTB2                | RHOBTB2   | 82.625 | 6.3671 | 1  |
| Q9H0E9 | Bromodomain-containing protein 8 OS=Homo sapiens GN=BRD8                              | BRD8      | 135.33 | -2     | 1  |
| Q9HIU4 | Multiple epidermal growth factor-like domains protein 9 OS=Homo sapiens GN=MEGF9      | MEGF9     | 62.983 | 19.827 | 3  |
| Q9H299 | SH3 domain-binding glutamic acid-rich-like protein 3 OS=Homo sapiens GN=SH3BGR13      | SH3BGR13  | 10.438 | 18.924 | 3  |
| Q9H4A4 | Aminopeptidase B OS=Homo sapiens GN=RNPEP                                             | RNPEP     | 72.595 | 11.264 | 2  |
| Q9H4A9 | Dipeptidase 2 OS=Homo sapiens GN=DPEP2                                                | DPEP2     | 53.305 | 48.687 | 4  |
| Q9H4G4 | Golgi-associated plant pathogenesis-related protein 1 OS=Homo sapiens GN=GLIPR2       | GLIPR2    | 17.218 | 71.068 | 3  |
| Q9H6X2 | Anthrax toxin receptor 1 OS=Homo sapiens GN=ANTXR1                                    | ANTXR1    | 62.788 | 6.6997 | 1  |
| Q9H8J5 | MANSC domain-containing protein 1 OS=Homo sapiens GN=MANSC1                           | MANSC1    | 46.81  | 8.9287 | 1  |
| Q9HBB8 | Cadherin-related family member 5 OS=Homo sapiens GN=CDHR5                             | CDHR5     | 88.222 | 71.516 | 3  |
| Q9HBR0 | Putative sodium-coupled neutral amino acid transporter 10 OS=Homo sapiens GN=SLC38A10 | SLC38A10  | 119.76 | 117.3  | 7  |
| Q9HBW9 | Adhesion G protein-coupled receptor L4 OS=Homo sapiens GN=ADGRL4                      | ADGRL4    | 77.81  | 12.703 | 2  |
| Q9HCB6 | Spontin-1 OS=Homo sapiens GN=SPON1                                                    | SPON1     | 90.973 | 12.428 | 2  |
| Q9HCD6 | Protein TANC2 OS=Homo sapiens GN=TANC2                                                | TANC2     | 219.65 | -2     | 1  |
| Q9HCL0 | Protocadherin-18 OS=Homo sapiens GN=PCDH18                                            | PCDH18    | 126.15 | 12.092 | 2  |
| Q9HCU0 | Endosialin OS=Homo sapiens GN=CD248                                                   | CD248     | 80.858 | 31.826 | 4  |
| Q9HDC9 | Adipocyte plasma membrane-associated protein OS=Homo sapiens GN=APMAP                 | APMAP     | 46.48  | 54.095 | 6  |
| Q9NPG4 | Protocadherin-12 OS=Homo sapiens GN=PCDH12                                            | PCDH12    | 128.99 | 17.378 | 2  |
| Q9NPH3 | Interleukin-1 receptor accessory protein OS=Homo sapiens GN=IL1RAP                    | IL1RAP    | 65.418 | 49.313 | 6  |
| Q9NPR2 | Semaphorin-4B OS=Homo sapiens GN=SEMA4B                                               | SEMA4B    | 92.192 | 52.36  | 4  |
| Q9NPN3 | Complement component C1q receptor OS=Homo sapiens GN=CD93                             | CD93      | 68.559 | 193.7  | 5  |
| Q9NQ79 | Cartilage acidic protein 1 OS=Homo sapiens GN=CRTAC1                                  | CRTAC1    | 71.42  | 121.39 | 9  |
| Q9NRW1 | Ras-related protein Rab-6B OS=Homo sapiens GN=RAB6B                                   | RAB6B     | 23.461 | 8.0338 | 1  |



|        |                                                                                            |           |        |        |    |
|--------|--------------------------------------------------------------------------------------------|-----------|--------|--------|----|
| Q9NS71 | Gastrokine-1 OS=Homo sapiens GN=GKN1                                                       | GKN1      | 21.999 | 8.3274 | 1  |
| Q9NT22 | EMILIN-3 OS=Homo sapiens GN=EMILIN3                                                        | EMILIN3   | 82.646 | 7.1736 | 1  |
| Q9NTK5 | Obg-like ATPase 1 OS=Homo sapiens GN=OLA1                                                  | OLA1      | 44.743 | 12.369 | 2  |
| Q9NTU7 | Cerebellin-4 OS=Homo sapiens GN=CBLN4                                                      | CBLN4     | 21.808 | 34.747 | 2  |
| Q9NX62 | Inositol monophosphatase 3 OS=Homo sapiens GN=IMPAD1                                       | IMPAD1    | 38.681 | 18.915 | 3  |
| Q9NY15 | Stabilin-1 OS=Homo sapiens GN=STAB1                                                        | STAB1     | 275.48 | 6.8618 | 1  |
| Q9NY97 | N-acetyllactosaminide beta-1,3-N-acetylglucosaminyltransferase 2 OS=Homo sapiens GN=B3GNT2 | B3GNT2    | 46.021 | 30.536 | 2  |
| Q9NZ08 | Endoplasmic reticulum aminopeptidase 1 OS=Homo sapiens GN=ERAP1                            | ERAP1     | 107.23 | 11.421 | 2  |
| Q9NZD4 | Alpha-hemoglobin-stabilizing protein OS=Homo sapiens GN=AHSP                               | AHSP      | 11.84  | 22.907 | 3  |
| Q9NZK5 | Adenosine deaminase CECR1 OS=Homo sapiens GN=CECR1                                         | CECR1     | 58.933 | 50.243 | 7  |
| Q9NZP8 | Complement C1r subcomponent-like protein OS=Homo sapiens GN=C1RL                           | C1RL      | 53.498 | 260.28 | 9  |
| Q9P121 | Neurotrimin OS=Homo sapiens GN=NTM                                                         | NTM       | 37.971 | 6.6173 | 1  |
| Q9P232 | Contactin-3 OS=Homo sapiens GN=CNTN3                                                       | CNTN3     | 112.88 | 6.1988 | 1  |
| Q9UBP4 | Dickkopf-related protein 3 OS=Homo sapiens GN=DKK3                                         | DKK3      | 38.39  | 19.996 | 3  |
| Q9UBQ6 | Exostosin-like 2 OS=Homo sapiens GN=EXTL2                                                  | EXTL2     | 37.465 | 44.078 | 5  |
| Q9UBR2 | Cathepsin Z OS=Homo sapiens GN=CTSZ                                                        | CTSZ      | 33.868 | 39.558 | 3  |
| Q9UBX1 | Cathepsin F OS=Homo sapiens GN=CTSF                                                        | CTSF      | 53.365 | 13.356 | 2  |
| Q9UBX5 | Fibulin-5 OS=Homo sapiens GN=FBLN5                                                         | FBLN5     | 50.18  | 24.423 | 4  |
| Q9UEU0 | Vesicle transport through interaction with t-SNAREs homolog 1B OS=Homo sapiens GN=VTI1B    | VTI1B     | 26.688 | 6.5075 | 1  |
| Q9UEW3 | Macrophage receptor MARCO OS=Homo sapiens GN=MARCO                                         | MARCO     | 52.657 | 23.894 | 2  |
| Q9UGM5 | Fetuin-B OS=Homo sapiens GN=FETUB                                                          | FETUB     | 42.054 | 166.11 | 7  |
| Q9UHG3 | Preylcysteine oxidase 1 OS=Homo sapiens GN=PCYOX1                                          | PCYOX1    | 56.639 | 162.99 | 11 |
| Q9UI42 | Carboxypeptidase A4 OS=Homo sapiens GN=CPA4                                                | CPA4      | 47.351 | 6.6004 | 1  |
| Q9UIJ9 | N-acetylglucosamine-1-phosphotransferase subunit gamma OS=Homo sapiens GN=GNPTG            | GNPTG     | 33.973 | 65.938 | 3  |
| Q9UK55 | Protein Z-dependent protease inhibitor OS=Homo sapiens GN=SERPINA10                        | SERPINA10 | 50.706 | 62.929 | 7  |
| Q9UKX5 | Integrin alpha-11 OS=Homo sapiens GN=ITGA11                                                | ITGA11    | 133.47 | 11.42  | 2  |
| Q9ULI3 | Protein HEG homolog 1 OS=Homo sapiens GN=HEG1                                              | HEG1      | 147.46 | 20.008 | 3  |
| Q9UM47 | Neurogenic locus notch homolog protein 3 OS=Homo sapiens GN=NOTCH3                         | NOTCH3    | 243.63 | 39.507 | 4  |
| Q9UNW1 | Multiple inositol polyphosphate phosphatase 1 OS=Homo sapiens GN=MINPP1                    | MINPP1    | 55.051 | 105.39 | 6  |
| Q9UPN9 | E3 ubiquitin-protein ligase TRIM33 OS=Homo sapiens GN=TRIM33                               | TRIM33    | 122.53 | 6.6744 | 1  |
| Q9Y240 | C-type lectin domain family 11 member A OS=Homo sapiens GN=CLEC11A                         | CLEC11A   | 35.694 | 18.889 | 3  |
| Q9Y3C8 | Ubiquitin-fold modifier-conjugating enzyme 1 OS=Homo sapiens GN=UFC1                       | UFC1      | 19.458 | 6.9424 | 1  |
| Q9Y490 | Talin-1 OS=Homo sapiens GN=TLN1                                                            | TLN1      | 269.76 | 31.691 | 3  |
| Q9Y4D7 | Plexin-D1 OS=Homo sapiens GN=PLXND1                                                        | PLXND1    | 212    | 13.976 | 2  |
| Q9Y4L1 | Hypoxia up-regulated protein 1 OS=Homo sapiens GN=HYOU1                                    | HYOU1     | 111.33 | 6.8712 | 1  |
| Q9Y5C1 | Angiopietin-related protein 3 OS=Homo sapiens GN=ANGPTL3                                   | ANGPTL3   | 53.637 | 46.475 | 5  |
| Q9Y5Y7 | Lymphatic vessel endothelial hyaluronic acid receptor 1 OS=Homo sapiens GN=LYVE1           | LYVE1     | 35.213 | 49.105 | 5  |
| Q9Y646 | Carboxypeptidase Q OS=Homo sapiens GN=CPQ                                                  | CPQ       | 51.887 | 14.291 | 2  |
| Q9Y689 | ADP-ribosylation factor-like protein 5A OS=Homo sapiens GN=ARL5A                           | ARL5A     | 20.728 | -2     | 1  |
| Q9Y6D5 | Brefeldin A-inhibited guanine nucleotide-exchange protein 2 OS=Homo sapiens GN=ARFGEF2     | ARFGEF2   | 202.04 | 6.4129 | 1  |
| Q9Y6R7 | IgGfC-binding protein OS=Homo sapiens GN=FCGBP                                             | FCGBP     | 572.01 | 76.262 | 9  |
| Q9Y6Z7 | Collectin-10 OS=Homo sapiens GN=COLEC10                                                    | COLEC10   | 30.705 | 85.177 | 4  |
