# Supplementary material for: TMT-Based Proteomic Analysis of Plasma from Children with Rolandic Epilepsy
Source: Hindawi journal article supplement (doi:10.1155/2020/8840482), 2020-10-07
Supplement: f4 [file 8840482.f4.pdf]

Table S3. The list of differentially expressed protein between epilepsy and control group by TMT-based proteomics analysis.

| Protein | E1/C1 | E2/C2 | E3/C3 | E4/C4 | E5/C5 | Down | Up | SUM |      |
|---------|-------|-------|-------|-------|-------|------|----|-----|------|
| P60201  | Up    |       |       | Down  | Up    | 1    | 2  | 3   | Up   |
| P13489  | Down  |       |       | Down  |       | 2    | 0  | 2   | Down |
| Q99972  | Up    |       | Up    |       |       | 0    | 2  | 2   | Up   |
| P10599  | Down  | Down  | Down  | Down  | Up    | 4    | 1  | 5   | Down |
| P00748  | Up    | Up    | Up    | Up    |       | 0    | 4  | 4   | Up   |
| P22105  | Down  |       |       | Down  |       | 2    | 0  | 2   | Down |
| P01008  | Down  |       | Up    |       |       | 1    | 1  | 2   |      |
| P02751  | Up    | Down  | Up    |       | Up    | 1    | 3  | 4   | Up   |
| P12821  | Down  | Down  | Up    | Down  |       | 3    | 1  | 4   | Down |
| P08123  | Down  | Down  | Up    |       |       | 2    | 1  | 3   | Down |
| P06276  | Up    |       |       | Down  | Down  | 2    | 1  | 3   | Down |
| P16157  | Down  | Down  |       |       | Up    | 2    | 1  | 3   | Down |
| P07942  | Down  |       |       | Down  |       | 2    | 0  | 2   | Down |
| P01023  | Down  |       | Up    | Down  | Up    | 2    | 2  | 4   |      |
| P00441  | Down  | Down  | Down  | Down  |       | 4    | 0  | 4   | Down |
| P17936  | Down  |       | Down  | Up    |       | 2    | 1  | 3   | Down |
| P48506  | Down  |       | Down  | Down  | Up    | 3    | 1  | 4   | Down |
| P29622  | Down  | Down  |       | Up    |       | 2    | 1  | 3   | Down |
| P02452  | Down  | Down  | Up    |       |       | 2    | 1  | 3   | Down |
| Q12884  | Down  |       |       | Down  |       | 2    | 0  | 2   | Down |
| P62158  | Down  | Down  | Down  | Down  | Up    | 4    | 1  | 5   | Down |
| Q06830  | Down  | Down  | Down  | Down  | Up    | 4    | 1  | 5   | Down |
| P32004  | Down  |       | Up    |       | Down  | 2    | 1  | 3   | Down |
| P06727  | Down  |       |       | Down  | Down  | 3    | 0  | 3   | Down |
| P02042  | Down  | Down  | Down  | Down  | Up    | 4    | 1  | 5   | Down |
| O43505  | Down  |       |       |       | Up    | 1    | 1  | 2   |      |
| P01024  | Up    |       | Down  |       |       | 1    | 1  | 2   |      |
| P61626  | Up    |       |       | Up    |       | 0    | 2  | 2   | Up   |
| P40925  | Down  | Down  | Down  | Down  |       | 4    | 0  | 4   | Down |
| Q9NPH3  | Down  |       | Down  |       |       | 2    | 0  | 2   | Down |
| P23142  | Down  | Down  | Up    |       |       | 2    | 1  | 3   | Down |
| P08195  | Down  |       | Up    |       |       | 1    | 1  | 2   |      |
| P13598  | Up    |       |       |       | Up    | 0    | 2  | 2   | Up   |
| P16035  | Down  | Down  |       |       |       | 2    | 0  | 2   | Down |
| P02549  | Down  | Down  |       | Down  | Up    | 3    | 1  | 4   | Down |
| P12111  | Down  | Down  | Up    |       |       | 2    | 1  | 3   | Down |
| P04004  | Up    |       |       |       | Down  | 1    | 1  | 2   |      |
| O95479  | Down  | Up    |       |       |       | 1    | 1  | 2   |      |
| P31151  | Down  | Up    |       |       | Up    | 1    | 2  | 3   | Up   |
| P04075  | Down  | Down  | Down  | Down  |       | 4    | 0  | 4   | Down |
| P49913  | Up    |       |       | Up    | Down  | 1    | 2  | 3   | Up   |
| P02743  | Up    |       | Down  | Up    |       | 1    | 2  | 3   | Up   |
| P60174  | Down  | Down  |       |       | Up    | 2    | 1  | 3   | Down |
| P02458  | Down  |       |       |       | Down  | 2    | 0  | 2   | Down |
| Q08554  | Down  |       |       |       | Up    | 1    | 1  | 2   |      |
| P62987  | Down  | Down  | Down  | Down  |       | 4    | 0  | 4   | Down |
| P02654  | Up    |       | Up    | Down  |       | 1    | 2  | 3   | Up   |
| P00568  | Down  | Down  | Down  | Down  |       | 4    | 0  | 4   | Down |
| O43866  | Down  |       | Up    | Up    |       | 1    | 2  | 3   | Up   |
| Q04756  | Up    | Down  |       | Down  |       | 2    | 1  | 3   | Down |
| Q13421  | Down  |       | Up    |       |       | 1    | 1  | 2   |      |
| P22891  | Up    | Down  |       |       |       | 1    | 1  | 2   |      |
| Q96KG7  | Down  |       |       | Down  |       | 2    | 0  | 2   | Down |
| P18428  | Up    | Down  | Down  | Up    |       | 2    | 2  | 4   |      |
| P08519  | Down  | Down  |       | Down  | Down  | 4    | 0  | 4   | Down |
| P26447  | Down  | Down  | Down  | Down  |       | 4    | 0  | 4   | Down |
| P07237  | Down  |       | Down  |       | Up    | 2    | 1  | 3   | Down |
| P01009  | Down  | Up    | Up    | Up    | Down  | 2    | 3  | 5   |      |
| P69892  | Down  | Down  |       | Down  | Up    | 3    | 1  | 4   | Down |
| P08253  | Down  |       | Up    |       |       | 1    | 1  | 2   |      |
| P54108  | Up    |       | Up    | Up    |       | 0    | 3  | 3   | Up   |
| Q14766  | Down  |       |       | Up    | Down  | 2    | 1  | 3   | Down |
| P18850  | Down  |       | Up    |       |       | 1    | 1  | 2   |      |
| P23526  | Down  | Down  | Down  | Down  | Up    | 4    | 1  | 5   | Down |
| P14923  | Down  |       |       |       | Up    | 1    | 1  | 2   |      |
| P15924  | Down  |       |       |       | Up    | 1    | 1  | 2   |      |
| Q99983  | Down  |       |       | Down  |       | 2    | 0  | 2   | Down |
| Q6UXB8  | Down  |       |       |       | Up    | 1    | 1  | 2   |      |
| P54289  | Down  |       | Up    |       | Down  | 2    | 1  | 3   | Down |
| P22392  | Down  | Down  | Down  | Down  |       | 4    | 0  | 4   | Down |
| Q9HDC9  | Up    |       | Up    | Down  |       | 1    | 2  | 3   | Up   |
| Q06033  | Down  |       |       |       | Up    | 1    | 1  | 2   |      |
| P00918  | Down  | Down  | Down  | Down  | Up    | 4    | 1  | 5   | Down |
| P07360  | Up    |       |       | Up    |       | 0    | 2  | 2   | Up   |
| Q01469  | Down  |       |       |       | Up    | 1    | 1  | 2   |      |
| P0DJ19  | Up    | Down  | Down  |       | Up    | 2    | 2  | 4   |      |
| P23471  | Down  |       |       | Down  |       | 2    | 0  | 2   | Down |
| P07358  | Up    |       |       | Up    |       | 0    | 2  | 2   | Up   |
| P32119  | Down  | Down  | Down  | Down  | Up    | 4    | 1  | 5   | Down |
| P02775  | Down  | Up    | Down  | Up    | Down  | 3    | 2  | 5   |      |
| P30041  | Down  | Down  | Down  | Down  | Down  | 5    | 0  | 5   | Down |
| Q13228  | Down  | Down  |       | Down  |       | 3    | 0  | 3   | Down |
| P63104  | Down  | Down  |       |       | Up    | 2    | 1  | 3   | Down |
| P02649  | Up    | Down  |       |       |       | 1    | 1  | 2   |      |
| Q96KN2  | Up    | Down  |       |       |       | 1    | 1  | 2   |      |
| Q6P179  | Down  | Up    |       | Up    | Down  | 2    | 2  | 4   |      |
| P04040  | Down  | Down  | Down  | Down  |       | 4    | 0  | 4   | Down |
| Q9Y5Y7  | Down  |       | Down  |       |       | 2    | 0  | 2   | Down |
| P01871  | Down  |       | Up    | Up    |       | 1    | 2  | 3   | Up   |
| P07339  | Up    |       |       | Up    |       | 0    | 2  | 2   | Up   |
| P43652  | Up    |       |       | Up    | Down  | 1    | 2  | 3   | Up   |
| P01780  | Down  |       |       | Up    |       | 1    | 1  | 2   |      |
| P08603  | Up    | Up    | Up    | Up    |       | 0    | 4  | 4   | Up   |
| P00558  | Down  | Down  |       | Down  |       | 3    | 0  | 3   | Down |
| P04278  | Down  |       | Up    | Down  | Up    | 2    | 2  | 4   |      |
| P02786  | Down  |       | Down  |       |       | 2    | 0  | 2   | Down |
| O00391  | Down  |       |       |       | Down  | 2    | 0  | 2   | Down |
| Q8NFI4  | Down  | Down  |       | Down  |       | 3    | 0  | 3   | Down |
| Q5T749  | Down  |       | Up    |       | Up    | 1    | 2  | 3   | Up   |
| Q9BYZ6  | Down  |       | Down  | Down  |       | 3    | 0  | 3   | Down |
| O14791  | Up    |       |       | Up    | Down  | 1    | 2  | 3   | Up   |
| P07359  | Down  | Up    |       | Up    |       | 1    | 2  | 3   | Up   |
| P02750  | Down  | Up    | Down  | Up    |       | 2    | 2  | 4   |      |

|        |      |      |      |      |      |
|--------|------|------|------|------|------|
| P01834 | Down |      | Up   | Down |      |
| O15335 | Down |      | Up   |      |      |
| Q08380 | Up   |      | Down | Down |      |
| P05090 | Down | Up   |      | Down |      |
| O15394 | Down |      |      | Up   |      |
| Q13103 | Down |      |      | Up   |      |
| P13591 | Down |      | Up   | Down |      |
| Q13201 | Down |      |      | Up   | Down |
| P0CG06 | Down | Up   |      |      | Down |
| P01857 | Down |      | Down |      | Down |
| P05154 | Down | Down |      |      |      |
| B9A064 | Down |      |      | Up   | Down |
| P68871 | Down | Down |      | Down | Up   |
| P58546 | Down |      |      | Down |      |
| P31947 | Down | Down |      | Down |      |
| P30043 | Down | Down |      | Down | Up   |
| P00738 | Up   | Down | Down | Up   | Down |
| P09960 | Up   | Down |      |      |      |
| P11226 | Down | Down | Up   | Down | Down |
| P02787 | Down |      |      | Up   |      |
| P35858 | Down |      |      | Up   |      |
| P43121 | Up   |      | Up   | Down |      |
| Q15063 | Down |      | Up   | Down | Down |
| P07911 | Down | Up   | Up   |      | Up   |
| P13716 | Down | Down | Down | Down |      |
| P13942 | Down | Down | Down | Down |      |
| Q02413 | Down |      |      |      | Up   |
| Q03591 | Up   | Up   |      |      | Up   |
| P24666 | Down | Down |      |      |      |
| Q6YHK3 | Down |      |      | Down |      |
| P14314 | Down |      |      |      | Down |
| P05156 | Up   | Up   | Down |      | Up   |
| P02763 | Up   | Up   | Down | Up   | Up   |
| P07738 | Down | Down |      | Down |      |
| P04406 | Down | Down | Down | Down | Up   |
| P01031 | Up   |      |      | Up   |      |
| P09486 | Down | Up   |      | Up   | Down |
| P19652 | Up   | Up   | Down | Up   |      |
| P00915 | Down | Down | Down | Down |      |
| P14543 | Down |      |      | Up   |      |
| Q6UY14 | Down |      | Up   | Down |      |
| P50395 | Down | Down | Down | Down |      |
| P04196 | Up   |      | Down |      |      |
| Q9Y6R7 |      | Up   |      | Down |      |
| P02647 |      | Down |      | Down |      |
| P11142 |      | Down | Down | Down |      |
| P03950 |      | Down |      | Up   | Down |
| P62258 |      | Down |      | Down |      |
| Q86UD1 |      | Down |      | Up   |      |
| P14780 |      | Down |      |      | Down |
| P01011 |      | Up   |      |      | Up   |
| P12259 |      | Down | Up   |      | Down |
| P36955 |      | Down | Down |      |      |
| Q6NXT2 |      | Up   | Down | Down | Up   |
| P02748 |      | Up   |      | Up   |      |
| P29401 |      | Down | Down | Down |      |
| P30566 |      | Down |      | Down |      |
| Q9BTY2 |      | Down |      |      | Down |
| P18065 |      | Up   | Up   |      | Down |
| Q15166 |      | Down |      | Down | Up   |
| P05186 |      | Up   | Up   |      |      |
| P55072 |      | Down | Down |      |      |
| Q99497 |      | Down |      | Down |      |
| P24593 |      | Down |      | Up   |      |
| P49908 |      | Down |      | Down |      |
| P01860 |      | Up   |      | Down | Down |
| P09172 |      | Up   | Up   | Up   | Up   |
| Q92496 |      | Up   | Down |      |      |
| Q4G0P3 |      | Down | Down |      |      |
| Q8NBP7 |      | Down |      | Down |      |
| P62937 |      | Down | Down | Down | Up   |
| P55103 |      | Down |      | Up   |      |
| P0COL5 |      | Up   |      |      | Up   |
| Q9UK55 |      | Down | Down |      |      |
| P35916 |      | Up   |      | Up   |      |
| P27169 |      | Down |      |      | Up   |
| Q9NZ08 |      | Down | Up   |      |      |
| P16070 |      | Up   | Up   |      |      |
| P78417 |      | Down |      | Down |      |
| P06733 |      | Down | Down |      | Up   |
| P06702 |      | Up   | Down | Up   |      |
| Q15113 |      | Up   | Up   |      |      |
| P30086 |      | Down |      | Down |      |
| P52209 |      | Down |      | Down | Up   |
| Q9Y5C1 |      | Down | Down |      | Up   |
| P54802 |      | Down |      | Down | Up   |
| P36980 |      | Up   | Down | Down | Up   |
| P00352 |      | Down | Down | Down |      |
| P11277 |      | Down |      | Down | Up   |
| P04275 |      | Down | Up   | Down |      |
| P06732 |      | Up   |      | Down |      |
| P26038 |      | Down |      | Down |      |
| P02656 |      |      | Up   | Down | Down |
| P02675 |      |      | Up   | Up   | Up   |
| Q86U17 |      |      | Up   |      | Down |
| Q99878 |      |      | Down |      | Up   |
| P35443 |      |      | Up   |      | Down |
| P10643 |      |      | Up   | Up   |      |
| Q6UVK1 |      |      | Up   | Down |      |
| P20742 |      |      | Up   | Up   |      |
| P19961 |      |      | Up   | Up   |      |
| P02745 |      |      | Down |      | Up   |
| P02671 |      |      | Up   | Up   | Up   |
| P55290 |      |      | Up   | Down |      |
| P11597 |      |      | Down | Down |      |

|   |   |   |      |
|---|---|---|------|
| 2 | 1 | 3 | Down |
| 1 | 1 | 2 |      |
| 2 | 1 | 3 | Down |
| 2 | 1 | 3 | Down |
| 1 | 1 | 2 |      |
| 1 | 1 | 2 |      |
| 2 | 1 | 3 | Down |
| 2 | 1 | 3 | Down |
| 2 | 1 | 3 | Down |
| 3 | 0 | 3 | Down |
| 2 | 0 | 2 | Down |
| 2 | 1 | 3 | Down |
| 3 | 1 | 4 | Down |
| 2 | 0 | 2 | Down |
| 3 | 0 | 3 | Down |
| 3 | 1 | 4 | Down |
| 3 | 2 | 5 |      |
| 1 | 1 | 2 |      |
| 4 | 1 | 5 | Down |
| 1 | 1 | 2 |      |
| 1 | 1 | 2 |      |
| 1 | 2 | 3 | Up   |
| 3 | 1 | 4 | Down |
| 1 | 3 | 4 | Up   |
| 4 | 0 | 4 | Down |
| 4 | 0 | 4 | Down |
| 1 | 1 | 2 |      |
| 0 | 3 | 3 | Up   |
| 2 | 0 | 2 | Down |
| 2 | 0 | 2 | Down |
| 2 | 0 | 2 | Down |
| 1 | 3 | 4 | Up   |
| 1 | 4 | 5 | Up   |
| 3 | 0 | 3 | Down |
| 4 | 1 | 5 | Down |
| 0 | 2 | 2 | Up   |
| 2 | 2 | 4 |      |
| 1 | 3 | 4 | Up   |
| 4 | 0 | 4 | Down |
| 1 | 1 | 2 |      |
| 2 | 1 | 3 | Down |
| 4 | 0 | 4 | Down |
| 1 | 1 | 2 |      |
| 1 | 1 | 2 |      |
| 2 | 0 | 2 | Down |
| 3 | 0 | 3 | Down |
| 2 | 1 | 3 | Down |
| 2 | 0 | 2 | Down |
| 1 | 1 | 2 |      |
| 2 | 0 | 2 | Down |
| 2 | 0 | 2 | Down |
| 1 | 2 | 3 | Up   |
| 2 | 1 | 3 | Down |
| 0 | 2 | 2 | Up   |
| 2 | 0 | 2 | Down |
| 2 | 0 | 2 | Down |
| 1 | 1 | 2 |      |
| 2 | 0 | 2 | Down |
| 2 | 1 | 3 | Down |
| 0 | 4 | 4 | Up   |
| 1 | 1 | 2 |      |
| 2 | 0 | 2 | Down |
| 2 | 0 | 2 | Down |
| 3 | 1 | 4 | Down |
| 1 | 1 | 2 |      |
| 0 | 2 | 2 | Up   |
| 2 | 0 | 2 | Down |
| 2 | 1 | 3 | Down |
| 2 | 1 | 3 | Down |
| 2 | 1 | 3 | Down |
| 2 | 2 | 4 |      |
| 3 | 0 | 3 | Down |
| 2 | 1 | 3 | Down |
| 2 | 1 | 3 | Down |
| 1 | 1 | 2 |      |
| 2 | 0 | 2 | Down |
| 2 | 1 | 3 | Down |
| 0 | 3 | 3 | Up   |
| 1 | 1 | 2 |      |
| 1 | 1 | 2 |      |
| 0 | 2 | 2 | Up   |
| 0 | 2 | 2 | Up   |
| 1 | 1 | 2 |      |
| 0 | 2 | 2 | Up   |
| 0 | 2 | 2 | Up   |
| 1 | 1 | 2 |      |
| 0 | 3 | 3 | Up   |
| 1 | 1 | 2 |      |
| 2 | 0 | 2 | Down |

|        |      |      |      |
|--------|------|------|------|
| P00740 | Down | Up   |      |
| P17813 | Up   | Down |      |
| P02679 | Up   | Up   | Up   |
| P02766 |      | Up   | Down |
| P08185 |      | Down | Up   |
| O15031 |      | Up   | Down |
| P14625 | Down | Down |      |
| P04433 | Up   | Up   | Down |
| P20023 | Up   | Up   |      |

|   |   |   |      |
|---|---|---|------|
| 1 | 1 | 2 |      |
| 1 | 1 | 2 |      |
| 0 | 3 | 3 | Up   |
| 1 | 1 | 2 |      |
| 1 | 1 | 2 |      |
| 1 | 1 | 2 |      |
| 2 | 0 | 2 | Down |
| 1 | 1 | 2 |      |
| 0 | 2 | 2 | Up   |

| group   | total |
|---------|-------|
| Up      | 46    |
| unknown | 12    |
| Down    | 111   |
